# Supplementary material for: Geodynamic seawater-sediment porewater evolution of the east central Atlantic Paleogene ocean margin revealed by U-Pb dating of sedimentary phosphates
Source: Frontiers journal article supplement (doi:10.3389/feart.2022.997008), 2022-09-07
Supplement: Table_1.XLSX [file Table_1.XLSX]

## Sheet: Table S1
Table S1. EPMA data.
Minimum detection limit
		Al	Fe	Mg	Mn	Ca	Na	K	Ti	P	S	Si	F	Cl
		ppm	ppm	ppm	ppm	ppm	ppm	ppm	ppm	ppm	ppm	ppm	ppm	ppm
		64	307	110	250	250	82	122	129	251	212	115	2003	219
Sample	Identifier	Al2O3	FeO	MgO	MnO	CaO	Na2O	K2O	TiO2	P2O5	SO2	SiO2	F	Cl	Total
		(%)	(%)	(%)	(%)	(%)	(%)	(%)	(%)	(%)	(%)	(%)	(wt.%)	(wt.%)	(%)
AMZ13	AMZ13-z2.1	0.2047	0.21	1.2186	0.0138	50.1793	0.546	0.0732	b.d.	32.1339	1.7906	3.7131	4.9545	0.1061	95.1437
	AMZ13-z2.2	0.2628	0.3248	0.9022	0.0074	51.3323	0.4219	0.0589	0.0241	32.1132	1.7838	2.5257	5.2207	0.0653	95.0432
	AMZ13-z2.3	0.1785	0.1542	0.6472	b.d.	51.1272	0.6386	0.0471	0.022	32.8933	1.6982	1.7193	5.1479	0.0377	94.3113
	AMZ13-z2.4	0.1063	0.0655	0.7129	b.d.	51.9422	0.6818	0.0166	0.0241	32.7963	1.7985	1.2921	4.9253	0.0602	94.4219
	AMZ13-z2.5	0.399	0.3129	1.1685	0.0103	50.6507	0.6229	0.1156	b.d.	32.865	1.5925	3.9798	5.232	0.0454	96.9948
	AMZ13-z2.6	0.2754	0.2723	1.067	0.0069	51.253	0.648	0.0625	b.d.	33.1208	1.5614	2.8826	5.2048	0.0655	96.4201
	AMZ13-z2.7	0.4198	0.2014	0.9359	0.0084	51.4908	0.7235	0.113	0.0377	32.2906	1.5362	2.7591	4.6229	0.0251	95.1644
	AMZ13-z1.8	0.4218	0.3716	0.9627	b.d.	50.2238	0.7351	0.092	b.d.	31.7361	1.5086	2.5126	5.2119	0.0627	93.8391
	AMZ13-z1.9	0.115	0.0664	0.7564	b.d.	52.4517	0.6256	0.04	0.3337	33.0356	1.681	1.3655	4.7292	0.0526	95.2527
	AMZ13-z1.10	0.2886	0.2005	0.7041	0.0044	50.2853	0.8034	0.1039	0.0178	32.2935	1.9311	2.0666	4.7189	0.1104	93.5284
	AMZ13-z1.11	0.4333	0.4077	0.9831	0.0191	50.9592	0.6475	0.1255	0.0073	32.6758	1.6248	3.2536	4.8077	0.088	96.0327
	AMZ13-z1.13	0.5241	0.3098	1.3842	0.0098	49.8078	0.5496	0.0821	0.0251	32.6296	1.5019	4.2555	5.4603	0.0504	96.5902
	AMZ13-z1.12	0.9024	0.5074	0.8131	b.d.	46.2996	0.5975	0.1218	0.0156	30.7765	1.7606	10.106	4.9238	0.0484	96.8726
AMZ9	AMZ9z1.1	1.1633	0.428	0.8308	0.007	51.6163	0.9424	0.2106	0.123	26.9351	2.5252	3.8922	5.2003	0.0771	93.9514
	AMZ9z1.2	0.7531	0.3337	0.9167	0.0025	50.5813	0.9646	0.1591	0.0137	26.4335	2.3838	3.1407	5.2329	0.1012	91.0169
	AMZ9z1.3	1.0179	0.6115	1.0978	b.d.	49.5601	1.0277	0.2332	0.0685	30.5513	2.2843	4.8989	4.9251	0.0784	96.3547
	AMZ9z1.4	1.4571	0.8801	1.162	0.0144	49.7747	0.9424	0.2404	0.0317	26.8232	2.243	6.5397	5.1745	0.0659	95.349
	AMZ9z1.5	1.4225	0.5072	1.0195	0.0021	51.8842	0.9102	0.2118	0.062	27.2624	2.2454	4.8806	5.055	0.0565	95.5193
	AMZ9z2.1	0.7283	0.7154	16.7605	0.0498	43.2837	0.3699	0.1208	0.0079	12.3689	0.842	2.9191	1.3134	0.058	79.5376
	AMZ9z2.2	1.1323	0.6617	1.0461	b.d.	50.1544	0.9746	0.2021	0.0204	26.083	2.4122	4.932	5.4096	0.0803	93.1087
	AMZ9z2.3	1.1416	0.5783	1.2643	0.0136	48.478	0.8855	0.2193	0.0121	26.2803	2.1483	5.6446	4.2247	0.0714	90.9621
	AMZ9z2.4	0.4663	0.2324	0.6154	0.0235	47.3121	1.2002	0.1417	0.0509	30.3987	1.9644	2.1179	3.5948	0.1362	88.2544
	AMZ9z2.5	2.4918	1.3426	1.4346	b.d.	45.961	0.8238	0.3744	0.0209	28.1242	1.8862	9.2708	4.3003	0.0734	96.1041
	AMZ9z2.6	1.0949	0.6676	1.045	0.0148	50.6888	1.1125	0.1645	0.3043	28.0378	2.0794	5.1492	4.855	0.0793	95.2931
	AMZ9z2.7	0.8969	0.3002	0.8321	0.0197	52.4242	0.902	0.1375	0.0008	26.834	2.3011	3.237	4.4099	0.0809	92.3762
AMZ8	AMZ8-z3.1	0.5079	0.304	1.1916	0.0217	49.6436	0.6765	0.0985	0.0063	32.1725	1.7798	3.6083	5.5755	b.d.	95.5861
	AMZ8-z3.2	0.6825	0.5397	1.3896	0.0123	49.6992	0.4694	0.1188	0.0168	31.4315	1.7598	4.5561	5.805	0.0506	96.5313
	AMZ8-z3.3	0.3297	0.2262	1.4367	0.0069	50.7539	0.5172	0.0593	0.0347	32.3765	1.834	4.0947	4.8078	0.0076	96.4851
	AMZ8-z2.4	0.6287	0.8296	1.2281	b.d.	49.8615	0.2779	0.1042	0.0073	31.8973	1.7465	4.8226	5.0318	0.081	96.5167
	AMZ8-z2.5	0.8369	0.3858	1.6213	b.d.	49.8653	0.6249	0.1654	0.0052	32.1174	1.6182	5.4138	5.3786	0.0634	98.0961
	AMZ8-z2.6	1.127	2.1333	2.4763	0.0153	45.3772	0.2641	0.1563	0.0292	29.4052	1.5952	10.0069	4.5284	0.0588	97.1733
	AMZ8-z2.7	0.574	0.6863	2.0356	0.0049	48.6528	0.3363	0.0835	0.0031	31.1911	1.6812	6.8122	4.8355	0.028	96.9246
	AMZ8-z2.8	2.4578	0.4274	0.9949	0.0025	46.4228	0.4223	0.1444	b.d.	30.629	2.1721	6.0417	4.2254	0.0561	93.9964
	AMZ8-z1.9	0.2143	0.644	20.7459	0.2724	33.2162	0.1845	0.0212	0.0126	2.873	0.3153	0.6656	0.2714	0.0373	59.4736
	AMZ8-z1.10	0.3884	0.4053	0.9338	0.0202	50.2222	0.4315	0.0714	0.0725	32.741	2.2103	3.03	5.5169	0.0558	96.0992
	AMZ8-z1.11	0.4659	0.9989	1.414	b.d.	47.7295	0.4401	0.0884	0.0189	30.673	1.7418	4.8613	4.5821	0.0711	93.085
	AMZ8-z1.12	0.8994	1.3093	2.4764	0.001	45.6245	0.4181	0.2061	0.0042	30.0252	1.7072	8.3796	4.1617	0.0717	95.2844
	AMZ8-z1.13	0.9432	0.4168	1.5136	b.d.	48.5754	0.512	0.1526	0.0116	31.693	1.8481	5.3221	5.2631	0.0611	96.3125
	AMZ8-z1.14	0.5699	0.679	1.8611	0.0305	47.1583	0.3063	0.1035	0.0471	31.3303	2.05	6.5416	5.4926	0.0815	96.2517
	AMZ8-z1.15	0.3859	0.4175	1.4093	0.0044	48.5366	0.3454	0.0707	0.001	31.5196	2.0705	4.6854	5.207	0.0355	94.6889
b.d. refers to below detection
Red values are not represented in Fig. SI6.

## Sheet: Table S2
Table S2. LA-ICP-MS data of NIST-612 and BIR-1G standards
Trace element composition																								Trace element composition
	baNist612_1	baNist612_2	baNist612_3	baNist612_4	baNist612_5	baNist612_6	baNist612_7	baNist612_8	Average	GeoRef 2021-Nist-612	Error relative to standard			ba_BIR_1G_1	ba_BIR_1G_2	ba_BIR_1G_3	ba_BIR_1G_4	ba_BIR_1G_5	GeoRef 2021-BIR_1G	Average	Error relative to standard			Element	daNist612_1	daNist612_2	daNist612_3	daNist612_4	daNist612_5	daNist612_6	daNist612_7	GeoRef 2021-Nist-612	Average	Error relative to standard			da_BIR_1G_1	da_BIR_1G_2	da_BIR_1G_3	da_BIR_1G_4	GeoRef 2021-BIR_1G	Average	Error relative to standard			Element	deNist612_1	deNist612_2	deNist612_3
Si29	333647	335356	335946	338337	335413	338973	335659	334977						246439	232131	251434	245234	234680						Si29	330449	333266	336788	340966	343001	341437	326599						132939	229504	239033	234363						Si29	309971	336718	356370
P31	34.15	44.7	56.77	64.34	59.18	58.49	57.05	55.84						80.25	74.94	86.08	81.89	83.93						P31	b.d.	b.d.	b.d.	b.d.	b.d.	b.d.	b.d.						b.d.	b.d.	b.d.	b.d.						P31	b.d.	b.d.	b.d.
Ca43	85262.5	85262.5	85262.5	85262.5	85262.5	85262.5	85262.5	85262.5						96270.2	96270.2	96270.2	96270.2	96270.2						Ca43	85262.5	85262.5	85262.5	85262.5	85262.5	85262.5	85262.5						95055.2	95055.2	95055.2	95055.2						Ca43	85262.5	85262.5	85262.5
Sc45	41.56	41.43	40.99	40.82	40.83	40.78	40.57	40.78	40.97	39.9	2.6817			44.67	43.24	44.54	44.27	44.3	43	44.204	2.8			Sc45	42.28	42.01	39.74	40.49	39.79	41.1	42.14	39.9	41.0786	2.95381			41.81	41.59	40.89	43.45	43	41.935	2.47674			Sc45	40.93	41.28	40.83
Ti47	49.81	47.96	48.61	47.27	47.45	47.3	47.43	48.81	48.08	44	9.27273			6163.5	6171.02	6234.84	6320.5	6322.63	5400	6242.5	15.6018			Ti47	49.05	48.12	46.64	48.65	47.89	47.63	48.74	44	48.1029	9.32468			6576.44	6372.01	6592.42	6375.26	5400	6479.03	19.9821			Ti47	47.72	48.58	48.16
V51	39.03	39.5	39.31	39.41	38.77	39.61	39.24	38.58	39.1812	38.8	0.982603			342.75	339.93	344.24	349.25	344.72	326	344.178	5.57607			V51	39.15	38.5	38.99	40.22	40.03	39.05	38.67	38.8	39.23	1.10825			333.25	329.34	328.88	331.88	326	330.837	1.4839			V51	38.94	38.74	39.22
Cr52	37.19	37.92	41.97	44.32	39.78	42.45	34.44	35.82	39.2362	36.4	7.7919			443.9	434.34	453.78	461.48	463.59	393	451.418	14.8646			Cr52	42.76	36.78	38.42	41.67	39.51	41.13	38.83	36.4	39.8714	9.53689			427.68	403.65	409.14	397.38	393	409.462	4.18893			Cr52	12.85	48.07	50.56
Mn55	37.05	38.05	38.63	40.58	37.86	37.9	39.3	38.61	38.4975	38.7	0.523256			1650.71	1623.15	1663.88	1643.16	1584.75	1471.47	1633.13	10.9863			Mn55	42.46	32.7	38.36	40.02	38.84	40.5	36.13	38.7	38.43	0.697674			1552.75	1488	1532.45	1560.8	1471.47	1533.5	4.21551			Mn55	31.31	40.62	40.2
Co59	35.1	34.62	35.26	35.57	35.67	35.51	35.39	35.24	35.295	35.5	0.577465			58.58	57.5	57.51	58	57.35	52	57.788	11.1308			Co59	35.08	34.67	35.38	35.89	36.09	34.83	34.96	35.5	35.2714	0.643863			56.38	55.95	54.07	54.18	52	55.145	6.04808			Co59	35.46	34.65	34.91
Ni60	38.54	37.99	38.21	39.16	38.58	38.26	38.65	38.15	38.4425	38.8	0.921392			189.03	188.74	187.48	189.33	186.29	178	188.174	5.71573			Ni60	37.55	38.69	38.9	38.75	39.03	38.11	38.16	38.8	38.4557	0.887334			188.31	177.47	185.8	180.59	178	183.042	2.83287			Ni60	38.6	37.89	38.04
Cu63	36.63	36.63	36.74	36.9	36.65	37	36.77	36.25	36.6962	37.8	2.91997			125.27	123.11	125.84	124.72	125.56	119	124.9	4.95798			Cu63	35.92	35.96	37.37	37.89	37.81	35.78	36.44	37.8	36.7386	2.80801			121.4	118.83	121.73	120.54	119	120.625	1.36555			Cu63	36.98	35.83	36.37
Zn66	35.28	36.34	38.94	38.92	41.11	38.33	40.36	36.33	38.2013	39.1	2.29859			101.8	104.36	103.44	103.56	103.94	78	103.42	32.5897			Zn66	36.12	35.58	39.69	40.99	40.01	37.02	36.54	39.1	37.9929	2.83157			107.44	98.12	100.42	89.72	78	98.925	26.8269			Zn66	34.57	36.28	40.87
Ga71	36.75	35.79	35.93	36.47	36.16	36.38	36.39	35.82	36.2112	36.9	1.86653			16.4	15.65	15.8	16.33	15.47	15	15.93	6.2			Ga71	36.15	35.63	36.15	36.69	37.6	35.7	35.85	36.9	36.2529	1.75377			16.2	15.22	15.58	15.59	15	15.6475	4.31667			Ga71	36.36	35.34	36.11
As75	35.69	34.65	38.31	39.29	38.78	38.74	38.89	37.01	37.67	35.7	5.51821			b.d.	b.d.	b.d.	b.d.	b.d.	0.33	b.d.	b.d.			As75	36.32	34.28	39.54	40.22	39.53	36.61	35.71	35.7	37.4586	4.92597			b.d.	0.21	0.371	0.205	0.33	0.262	20.6061			As75	34.27	36.69	39.61
Se77	16.67	14.67	16.63	17.02	15.86	15.9	15.88	15.83	16.0575	16.3	1.48773			b.d.	b.d.	b.d.	b.d.	b.d.	0.067	b.d.	b.d.			Se77	15.27	14.59	16.78	17.63	17.01	16.3	15.08	16.3	16.0943	1.26205			b.d.	b.d.	b.d.	b.d.	0.067	b.d.	b.d.			Se77	15.21	15.91	16.54
Rb85	31.73	31.45	31.63	31.81	31.41	31.74	31.62	31.78	31.6463	31.4	0.784236			0.244	0.204	0.241	0.237	0.207	0.197	0.2266	15.0254			Rb85	31.91	31.94	31.51	31	31.75	31.2	32.13	31.4	31.6343	0.746133			0.25	0.202	0.215	0.274	0.197	0.23525	19.4162			Rb85	32.27	31.38	30.75
Sr88	76.77	75.84	75.91	76.3	76.14	76.12	76.04	75.76	76.11	78.4	2.92092			108.03	105.4	107.25	106.36	106.05	109	106.618	2.18532			Sr88	77.24	77.54	74.66	75.21	75.26	75.68	77.57	78.4	76.1657	2.84985			105.7	101.28	102.39	105.16	109	103.632	4.92431			Sr88	77.65	75.95	74.55
Y89	38.24	38.11	38.1	38.7	38.5	37.99	37.84	38.73	38.2763	38.3	0.0620104			14.48	14.38	14.24	14.54	14.52	14.3	14.432	0.923077			Y89	38.51	38.71	37.55	38.17	38.03	38.33	38.45	38.3	38.25	0.130548			13.47	13.71	13.14	13.86	14.3	13.545	5.27972			Y89	37.51	38.9	38.16
Zr91	35.62	35.55	35.72	36.45	36.67	37.07	35.59	35.68	36.0437	37.9	4.89776			13.04	13.37	13.38	13.46	13.06	14	13.262	5.27143			Zr91	35.58	36.37	35.58	36.4	36.35	35.73	35.93	37.9	35.9914	5.03581			12.21	12.52	12.17	13.02	14	12.48	10.8571			Zr91	35.59	36.23	36.07
Nb93	37.82	37.81	38.18	38.06	38.49	38.27	38.15	37.91	38.0863	38.9	2.0919			0.485	0.52	0.485	0.502	0.501	0.52	0.4986	4.11538			Nb93	37.92	38.08	37.55	38.82	38.21	37.87	37.99	38.9	38.0629	2.15204			0.533	0.516	0.515	0.527	0.52	0.52275	0.528846			Nb93	37.59	37.84	38.23
Cd111	27.23	26.54	29.04	29.44	29.61	28.97	28.91	28.24	28.4975	28.1	1.41459			0.161	0.173	0.154	0.179	0.253	0.14	0.184	31.4286			Cd111	26.71	27.23	29.68	30.44	29.46	28.15	27.1	28.1	28.3957	1.05236			0.126	0.228	0.074	0.156	0.14	0.146	4.28571			Cd111	26.2	27.52	29.63
Sn118	37.89	37.75	37.53	38.02	37.95	38.8	38.54	37.84	38.04	38.6	1.45078			1.43	1.181	1.307	1.208	1.097	2.3	1.2446	45.887			Sn118	37.16	38.21	38.16	38.26	38.68	37.55	37.77	38.6	37.97	1.63212			1.662	1.568	1.564	1.608	2.3	1.6005	30.413			Sn118	38.12	36.77	38.1
Cs133	41.83	41.34	41.17	41.91	41.64	42.11	41.82	41.62	41.68	42.7	2.38876			b.d.	b.d.	b.d.	b.d.	b.d.	0.007	b.d.	b.d.			Cs133	42.09	41.82	41.11	41.36	41.9	41.13	42.08	42.7	41.6414	2.47909			b.d.	b.d.	b.d.	0.0119	0.007	0.0119	70			Cs133	42.56	41.09	40.76
Ba137	37.73	38.18	37.77	37.94	37.87	37.1	37.1	37.67	37.67	39.3	4.14758			5.74	6.38	6.07	6.33	6.32	6.5	6.168	5.10769			Ba137	38.63	38.32	37.03	37	37.21	37.18	38.87	39.3	37.7486	3.94766			6.39	6.01	6	6.41	6.5	6.2025	4.57692			Ba137	38.54	37.67	36.77
La139	35.71	35.6	35.86	35.69	35.93	35.99	35.56	36.18	35.815	36	0.513889			0.58	0.567	0.618	0.615	0.578	0.609	0.5916	2.85714			La139	35.44	35.7	35.63	36.5	35.91	35.62	35.62	36	35.7743	0.626984			0.589	0.59	0.598	0.599	0.609	0.594	2.46305			La139	35.41	35.42	36.17
Ce140	38.23	37.94	38.84	38.5	38.33	38.3	38.29	38.5	38.3663	38.4	0.0878906			1.884	1.914	1.824	1.934	1.872	1.89	1.8856	0.232804			Ce140	38.05	37.78	39.03	38.92	38.58	37.61	38.55	38.4	38.36	0.104167			1.921	1.843	1.885	1.903	1.89	1.888	0.10582			Ce140	38.38	37.93	38.43
Pr141	36.89	37.02	37.48	37.57	37.19	36.95	37.18	37.02	37.1625	37.9	1.94591			0.368	0.362	0.352	0.364	0.3	0.37	0.3492	5.62162			Pr141	37.45	37.99	36.62	36.68	36.68	36.78	37.98	37.9	37.1686	1.92989			0.371	0.341	0.347	0.348	0.37	0.35175	4.93243			Pr141	37.78	36.89	36.81
Nd146	35.06	34.98	35.18	35.99	34.95	35.02	35.76	35.52	35.3075	35.5	0.542254			2.29	2.38	2.3	2.45	2.14	2.37	2.312	2.44726			Nd146	35.62	36.23	34.33	34.66	34.73	35.56	35.6	35.5	35.2471	0.712274			2.259	2.23	2.41	2.26	2.37	2.28975	3.38608			Nd146	35.54	35.24	34.9
Sm147	36.73	36.44	36.58	36.83	37.44	36.34	36.99	36.79	36.7675	37.7	2.47347			0.946	1.054	1.003	1.097	1.097	1.09	1.0394	4.6422			Sm147	37.52	37.62	35.79	36.05	35.69	37.01	37.45	37.7	36.7329	2.56537			1.029	0.995	0.993	1.035	1.09	1.013	7.06422			Sm147	37.04	36.9	36.11
Eu151	34.08	34.39	34.63	34.58	34.63	34.55	34.63	34.11	34.45	35.6	3.23034			0.473	0.51	0.49	0.521	0.5	0.517	0.4988	3.52031			Eu151	34.88	35.19	33.93	33.83	33.79	34.35	35.16	35.6	34.4471	3.23836			0.498	0.472	0.509	0.483	0.517	0.4905	5.12573			Eu151	34.6	34.46	34.21
Gd157	36.5	36.7	36.99	37.09	37.81	36.95	37	37.2	37.03	37.3	0.723861			2	1.741	1.879	1.91	1.73	1.85	1.852	0.108108			Gd157	37.6	39.09	35.4	35.53	36.15	37.28	37.86	37.3	36.9871	0.838759			1.6	1.67	1.67	1.68	1.85	1.655	10.5405			Gd157	37.42	37.24	36.73
Tb159	35.9	35.51	36.17	35.87	36.38	35.84	35.95	35.88	35.9375	37.6	4.42154			0.326	0.34	0.328	0.351	0.332	0.35	0.3354	4.17143			Tb159	36.44	36.84	35.23	35.16	35.21	36.1	36.54	37.6	35.9314	4.43769			0.295	0.313	0.321	0.3	0.35	0.30725	12.2143			Tb159	35.72	36.34	35.8
Dy163	36.34	35.65	35.83	36.37	35.91	35.9	35.89	35.52	35.9262	35.5	1.2007			2.5	2.39	2.49	2.62	2.55	2.55	2.51	1.56863			Dy163	36.59	36.8	34.58	35.88	35.59	35.93	36.48	35.5	35.9786	1.34809			2.39	2.41	2.33	2.42	2.55	2.3875	6.37255			Dy163	36.1	36.21	35.7
Ho165	37.95	37.9	37.79	37.57	38.4	37.7	38.05	37.56	37.865	38.3	1.13577			0.545	0.508	0.556	0.535	0.525	0.56	0.5338	4.67857			Ho165	38.72	38.81	36.94	37.06	37.06	37.85	38.77	38.3	37.8871	1.07796			0.5	0.54	0.515	0.539	0.56	0.5235	6.51786			Ho165	37.91	38.38	37.6
Er167	36.94	38.02	37.72	37.18	37.2	37.74	37.24	37.68	37.465	38	1.40789			1.712	1.743	1.647	1.788	1.655	1.7	1.709	0.529412			Er167	38.2	38.33	36.22	36.98	36.72	37.56	38.08	38	37.4414	1.46992			1.457	1.507	1.456	1.63	1.7	1.5125	11.0294			Er167	37.42	37.52	37.4
Tm169	37.49	37.38	37.75	37.58	37.64	37.81	37.26	37.49	37.55	36.8	2.03804			0.237	0.242	0.236	0.242	0.263	0.24	0.244	1.66667			Tm169	37.93	38.65	36.52	37.1	36.94	37.67	38.12	36.8	37.5614	2.0691			0.219	0.233	0.222	0.249	0.24	0.23075	3.85417			Tm169	37.52	37.81	37.34
Yb173	40.05	39.79	40.04	39.66	40.54	39.18	40.45	40.43	40.0175	39.2	2.08546			1.544	1.661	1.699	1.508	1.85	1.64	1.6524	0.756098			Yb173	40.67	41.08	39.01	39.22	38.73	40.2	40.85	39.2	39.9657	1.95335			1.721	1.634	1.505	1.59	1.64	1.6125	1.67683			Yb173	40.52	39.42	39.74
Lu175	37.49	37.62	37.96	37.84	37.75	37.73	37.81	37.45	37.7062	37	1.90878			0.268	0.22	0.261	0.238	0.268	0.248	0.251	1.20968			Lu175	38.08	38.4	37.11	37.2	37.3	37.71	38.2	37	37.7143	1.9305			0.227	0.235	0.235	0.242	0.248	0.23475	5.34274			Lu175	37.24	37.98	37.89
Hf177	34.65	34.74	34.75	34.94	35.17	34.57	34.68	34.7	34.775	36.7	5.24523			0.524	0.552	0.506	0.54	0.581	0.57	0.5406	5.15789			Hf177	34.06	35.31	34.96	34.91	34.52	35.17	34.51	36.7	34.7771	5.23939			0.436	0.506	0.519	0.483	0.57	0.486	14.7368			Hf177	33.9	35	35.2
Ta181	39.76	39.44	39.89	39.75	39.96	40.04	39.97	39.37	39.7725	37.6	5.77793			0.0341	0.036	0.0322	0.0366	0.0354	0.036	0.03486	3.16667			Ta181	39.48	39.65	39.56	40.72	39.64	39.83	39.55	37.6	39.7757	5.78647			0.0358	0.0386	0.0379	0.0403	0.036	0.03815	5.97222			Ta181	38.7	39.57	40.79
Au197	5.08	4.94	5.07	5.09	5.06	5.38	5.36	4.91	5.11125	4.77	7.15409			0.228	0.256	0.232	0.247	0.235	0.0828	0.2396	189.372			Pb208	38.36	38.33	40.1	39.42	39.15	38.77	38.69	38.57	38.9743	1.04819			3.96	3.7	3.84	3.85	3.7	3.8375	3.71622			Pb208	38.9	38.23	39.03
Pb208	38.86	39.03	38.79	38.96	38.73	39.09	39.77	38.61	38.98	38.57	1.063			4.02	4.06	3.86	3.83	3.89	3.7	3.932	6.27027			Th232	36.48	36.68	37.7	38.59	37.45	37.18	36.68	37.79	37.2514	1.42517			0.028	0.0298	0.0272	0.0311	0.03	0.029025	3.25			Th232	35.97	37.49	38.28
Th232	37.6	37.76	37.23	36.8	37	36.71	37.18	37.17	37.1812	37.79	1.61088			0.0226	0.025	0.0253	0.0333	0.029	0.03	0.02704	9.86667			U238	37.25	36.78	37.69	36.88	37.37	36.77	37.33	37.38	37.1529	0.607659			0.0162	0.0188	0.0149	0.0184	0.023	0.017075	25.7609			U238	37.26	37.15	36.54
U238	37.62	37.74	37.37	36.69	36.37	36.24	37.46	37.64	37.1412	37.38	0.638711			0.0052	0.019	0.0162	0.0106	0.0255	0.023	0.0153	33.4783
b.d. refers to below detection
1 sigma error																								1 sigma error																						1 sigma error
	baNist612_1	baNist612_2	baNist612_3	baNist612_4	baNist612_5	baNist612_6	baNist612_7	baNist612_8						ba_BIR_1G_1	ba_BIR_1G_2	ba_BIR_1G_3	ba_BIR_1G_4	ba_BIR_1G_5							daNist612_1	daNist612_2	daNist612_3	daNist612_4	daNist612_5	daNist612_6	daNist612_7						da_BIR_1G_1	da_BIR_1G_2	da_BIR_1G_3	da_BIR_1G_4							deNist612_1	deNist612_2	deNist612_3
Si29	13989.8	14064.5	14112.5	14250.4	14178.5	14384.4	14382.3	14528.6						10340.2	9757.4	10599.5	10417.2	10068.5						Si29	17192.8	17323.8	17586.7	18125.2	19472.7	21215.5	22046.8						6909.4	12251.9	13664.8	14682.4						Si29	26406.3	28635.5	30902.8
P31	7.76	10.06	12.31	13.79	12.78	12.87	13.25	13.84						17.92	16.2	18.45	18.08	19.6						P31	7.58	93.45	114.25	13.62	240.82	770	898.5						432.45	206.32	566.42	923						P31	2151.32	201.14	3078.09
Ca43	2704.79	2705.26	2704.78	2704.73	2705.19	2705.69	2706.31	2705.61						3057.12	3056.85	3058.21	3058.31	3059.43						Ca43	2701.23	2701.26	2701.45	2701.36	2701.47	2701.6	2701.61						3012.25	3013.17	3013.03	3013.42						Ca43	2701.49	2701.58	2701.76
Sc45	1.44	1.44	1.43	1.44	1.46	1.48	1.54	1.64						1.55	1.51	1.58	1.62	1.7						Sc45	2.06	2.05	2	2.16	2.49	3.09	3.69						2.05	2.24	2.6	3.32						Sc45	1.34	1.35	1.34
Ti47	2.49	2.42	2.44	2.44	2.55	2.64	2.91	3.28						284.88	289.36	300.99	332.2	367.93						Ti47	2.07	2.03	2	2.14	2.3	2.56	2.89						267.72	271.95	310.1	338.03						Ti47	1.79	1.83	1.82
V51	1.77	1.79	1.78	1.8	1.78	1.84	1.88	1.91						15.45	15.35	15.63	16.18	16.44						V51	1.86	1.82	1.85	1.95	2.07	2.2	2.36						15.72	15.97	17.05	18.82						V51	1.72	1.71	1.74
Cr52	4.78	4.88	5.52	6.11	5.89	6.74	6.4	7.77						56.46	56.9	62.76	73.73	86.56						Cr52	3.59	3.09	3.32	3.82	4.31	5.42	5.92						35.65	37.24	45.15	52.99						Cr52	5.95	21.87	22.26
Mn55	1.99	2.05	2.08	2.24	2.18	2.28	2.6	2.83						85.54	85.15	89.83	96.72	103.34						Mn55	5.05	3.9	4.82	5.49	6.71	8.89	9.53						185.25	207.19	269.92	348.96						Mn55	4.65	6.02	6.15
Co59	1.25	1.23	1.25	1.27	1.29	1.3	1.35	1.4						2.08	2.04	2.06	2.13	2.19						Co59	1.32	1.31	1.35	1.41	1.56	1.69	1.89						2.13	2.22	2.36	2.66						Co59	1.35	1.32	1.34
Ni60	1.4	1.39	1.39	1.44	1.43	1.44	1.5	1.53						6.76	6.76	6.77	6.99	7.11						Ni60	1.41	1.45	1.47	1.51	1.65	1.79	1.97						7	6.88	7.85	8.51						Ni60	1.56	1.53	1.56
Cu63	1.31	1.31	1.31	1.33	1.33	1.35	1.37	1.39						4.46	4.38	4.5	4.54	4.68						Cu63	1.7	1.7	1.81	1.92	2.2	2.44	2.84						5.74	6.07	7.17	8.34						Cu63	1.6	1.55	1.61
Zn66	3.68	3.77	3.94	3.93	4.22	4.04	4.53	4.39						10.44	10.49	10.42	10.91	11.71						Zn66	4.41	4.27	4.42	4.47	4.49	4.42	4.6						12.66	10.66	11.28	10.75						Zn66	4.19	4.34	4.69
Ga71	1.31	1.28	1.29	1.32	1.32	1.35	1.4	1.45						0.6	0.58	0.59	0.63	0.62						Ga71	1.47	1.45	1.5	1.58	1.82	1.99	2.26						0.67	0.67	0.77	0.89						Ga71	1.61	1.57	1.64
As75	5.14	4.95	5.25	5.23	5.07	5.02	5.03	4.85						0.12	0.11	0.11	0.11	0.1						As75	6.2	5.77	6.13	5.99	5.75	5.43	5.46						0.068	0.064	0.073	0.056						As75	4.64	4.92	5.07
Se77	1.5	1.36	1.47	1.52	1.48	1.55	1.67	1.81						0.68	0.59	0.64	0.61	0.6						Se77	1.86	1.77	1.96	2.1	2.24	2.41	2.44						0.32	0.27	0.22	0.19						Se77	1.08	1.12	1.18
Rb85	1.03	1.03	1.03	1.04	1.03	1.05	1.06	1.08						0.018	0.016	0.018	0.018	0.018						Rb85	1.13	1.14	1.14	1.15	1.28	1.42	1.63						0.013	0.012	0.013	0.017						Rb85	1.31	1.27	1.27
Sr88	2.49	2.46	2.46	2.48	2.49	2.5	2.54	2.57						3.5	3.42	3.49	3.5	3.54						Sr88	2.93	2.95	2.9	3.02	3.39	3.94	4.6						4.02	4.1	4.66	5.55						Sr88	3.12	3.06	3.07
Y89	1.32	1.32	1.32	1.36	1.37	1.37	1.42	1.53						0.51	0.51	0.51	0.53	0.55						Y89	1.32	1.33	1.3	1.34	1.4	1.52	1.64						0.46	0.49	0.49	0.56						Y89	1.73	1.8	1.81
Zr91	1.5	1.5	1.51	1.58	1.64	1.71	1.79	1.96						0.59	0.61	0.63	0.67	0.7						Zr91	1.25	1.28	1.26	1.31	1.37	1.45	1.55						0.45	0.48	0.48	0.55						Zr91	1.44	1.47	1.49
Nb93	1.27	1.27	1.28	1.28	1.3	1.31	1.33	1.35						0.024	0.025	0.024	0.025	0.026						Nb93	1.31	1.32	1.31	1.37	1.42	1.5	1.61						0.022	0.022	0.023	0.024						Nb93	1.55	1.56	1.6
Cd111	1.99	1.94	2.09	2.14	2.22	2.26	2.45	2.62						0.06	0.054	0.059	0.058	0.065						Cd111	2.34	2.36	2.51	2.64	2.84	3.07	3.23						0.029	0.041	0.027	0.035						Cd111	2.54	2.65	2.81
Sn118	1.34	1.33	1.33	1.36	1.37	1.43	1.48	1.53						0.085	0.077	0.086	0.083	0.082						Sn118	1.35	1.39	1.4	1.44	1.57	1.68	1.85						0.072	0.072	0.075	0.083						Sn118	1.58	1.52	1.61
Cs133	1.39	1.38	1.37	1.4	1.41	1.44	1.46	1.5						0.0051	0.0049	0.005	0.0049	0.0049						Cs133	1.42	1.41	1.4	1.44	1.55	1.66	1.86						0.0038	0.0037	0.0036	0.0042						Cs133	1.61	1.55	1.57
Ba137	1.38	1.4	1.39	1.41	1.44	1.44	1.52	1.64						0.26	0.29	0.29	0.3	0.32						Ba137	1.65	1.64	1.63	1.71	2	2.39	2.92						0.29	0.3	0.34	0.43						Ba137	1.64	1.6	1.61
La139	1.19	1.19	1.2	1.2	1.22	1.23	1.25	1.31						0.027	0.026	0.029	0.029	0.029						La139	1.21	1.22	1.22	1.27	1.31	1.39	1.47						0.023	0.024	0.025	0.027						La139	1.54	1.54	1.61
Ce140	1.27	1.26	1.29	1.28	1.29	1.3	1.33	1.37						0.071	0.072	0.07	0.075	0.075						Ce140	1.4	1.39	1.45	1.49	1.61	1.77	2.01						0.073	0.074	0.082	0.093						Ce140	1.45	1.43	1.47
Pr141	1.26	1.27	1.29	1.3	1.3	1.32	1.38	1.44						0.019	0.018	0.019	0.019	0.018						Pr141	1.43	1.45	1.43	1.49	1.67	1.93	2.27						0.016	0.016	0.018	0.02						Pr141	1.49	1.46	1.49
Nd146	1.24	1.24	1.25	1.3	1.29	1.32	1.42	1.51						0.1	0.11	0.11	0.12	0.11						Nd146	1.44	1.47	1.42	1.5	1.73	2.09	2.42						0.099	0.11	0.13	0.14						Nd146	1.38	1.37	1.38
Sm147	1.28	1.27	1.28	1.3	1.35	1.33	1.42	1.5						0.056	0.06	0.06	0.065	0.068						Sm147	1.66	1.66	1.63	1.73	2.01	2.51	2.96						0.054	0.057	0.064	0.078						Sm147	1.46	1.46	1.45
Eu151	1.11	1.12	1.13	1.13	1.14	1.15	1.19	1.21						0.024	0.025	0.025	0.027	0.027						Eu151	1.37	1.38	1.36	1.41	1.6	1.89	2.21						0.023	0.023	0.027	0.03						Eu151	1.33	1.33	1.34
Gd157	1.32	1.33	1.34	1.37	1.42	1.42	1.51	1.62						0.1	0.09	0.099	0.1	0.1						Gd157	2.2	2.29	2.17	2.35	2.92	3.77	4.58						0.1	0.12	0.14	0.18						Gd157	1.56	1.55	1.57
Tb159	1.16	1.15	1.17	1.16	1.19	1.18	1.21	1.24						0.015	0.016	0.016	0.017	0.017						Tb159	1.5	1.52	1.48	1.55	1.77	2.13	2.47						0.014	0.016	0.018	0.019						Tb159	1.53	1.56	1.57
Dy163	1.23	1.21	1.22	1.24	1.25	1.26	1.31	1.35						0.11	0.1	0.11	0.11	0.12						Dy163	1.55	1.56	1.5	1.63	1.86	2.22	2.59						0.11	0.12	0.13	0.16						Dy163	1.65	1.66	1.68
Ho165	1.25	1.25	1.25	1.25	1.29	1.28	1.33	1.36						0.023	0.022	0.024	0.024	0.024						Ho165	1.71	1.72	1.68	1.77	2.05	2.5	2.96						0.024	0.028	0.03	0.037						Ho165	1.66	1.68	1.69
Er167	1.35	1.39	1.38	1.38	1.41	1.47	1.54	1.67						0.083	0.084	0.083	0.091	0.09						Er167	1.65	1.66	1.6	1.72	1.96	2.37	2.76						0.07	0.078	0.086	0.11						Er167	1.43	1.43	1.45
Tm169	1.23	1.22	1.24	1.24	1.25	1.27	1.28	1.33						0.013	0.013	0.013	0.013	0.015						Tm169	1.56	1.59	1.54	1.63	1.85	2.2	2.54						0.011	0.012	0.013	0.016						Tm169	1.59	1.61	1.62
Yb173	1.44	1.43	1.45	1.45	1.51	1.49	1.62	1.71						0.086	0.09	0.095	0.09	0.11						Yb173	1.85	1.87	1.83	1.93	2.21	2.73	3.19						0.09	0.093	0.097	0.12						Yb173	1.53	1.49	1.53
Lu175	1.21	1.21	1.23	1.23	1.23	1.24	1.26	1.28						0.014	0.012	0.015	0.014	0.015						Lu175	1.39	1.4	1.37	1.41	1.54	1.74	1.95						0.011	0.012	0.012	0.014						Lu175	1.63	1.66	1.69
Hf177	1.17	1.18	1.18	1.19	1.22	1.21	1.25	1.3						0.039	0.04	0.04	0.041	0.045						Hf177	1.22	1.27	1.27	1.29	1.37	1.52	1.62						0.026	0.031	0.032	0.032						Hf177	1.4	1.45	1.48
Ta181	1.3	1.29	1.31	1.31	1.32	1.33	1.35	1.36						0.0047	0.005	0.0051	0.0049	0.0053						Ta181	1.39	1.39	1.4	1.46	1.49	1.61	1.7						0.0033	0.0037	0.0036	0.0038						Ta181	1.73	1.76	1.85
Au197	0.32	0.31	0.32	0.32	0.33	0.36	0.39	0.39						0.024	0.025	0.024	0.026	0.026						Pb208	1.45	1.45	1.55	1.57	1.73	1.95	2.17						0.15	0.15	0.17	0.2						Pb208	1.47	1.45	1.5
Pb208	1.35	1.36	1.35	1.37	1.38	1.41	1.5	1.53						0.15	0.15	0.15	0.15	0.16						Th232	1.52	1.53	1.59	1.68	1.81	2.04	2.23						0.0027	0.0029	0.0028	0.0031						Th232	1.72	1.8	1.88
Th232	1.3	1.31	1.3	1.29	1.32	1.33	1.41	1.48						0.0034	0.0036	0.0038	0.0044	0.0042						U238	1.24	1.22	1.26	1.26	1.34	1.42	1.55						0.0017	0.002	0.0017	0.002						U238	1.31	1.3	1.3
U238	1.44	1.45	1.44	1.44	1.47	1.51	1.67	1.83						0.0016	0.0031	0.003	0.0024	0.004
Detection limit																								Detection limit																						Detection limit
	baNist612_1	baNist612_2	baNist612_3	baNist612_4	baNist612_5	baNist612_6	baNist612_7	baNist612_8						ba_BIR_1G_1	ba_BIR_1G_2	ba_BIR_1G_3	ba_BIR_1G_4	ba_BIR_1G_5							daNist612_1	daNist612_2	daNist612_3	daNist612_4	daNist612_5	daNist612_6	daNist612_7						da_BIR_1G_1	da_BIR_1G_2	da_BIR_1G_3	da_BIR_1G_4							deNist612_1	deNist612_2	deNist612_3
Si29	103.08	99.68	68.11	59.33	55.7	53.47	43.9	39.73						128.81	99.98	92.6	79.65	64.08						Si29	276.19	277.51	223.45	198.02	180.37	167.44	168.11						331.18	277.75	239.01	234.97						Si29	208.52	201.46	185.84
P31	1.62	1.61	1.18	1.04	0.952	0.901	0.758	0.663						2.13	1.74	1.61	1.34	1.09						P31	4.33	4.43	4.06	4.04	4.82	6.57	10.89						5.35	5.79	6.54	9.6						P31	<0.00000	<0.00000	<0.00000
Ca43	54.87	55.43	51.68	51.75	53.79	54.91	56.4	52.27						76.84	77.44	82.09	83.71	83.8						Ca43	64.6	65.56	66.09	61.51	62.37	63.78	64.35						80.03	85.46	84.18	88.65						Ca43	68.72	65.87	64.85
Sc45	0.074	0.0734	0.0575	0.0547	0.0533	0.0536	0.0515	0.0474						0.097	0.0858	0.0855	0.0829	0.0769						Sc45	0.069	0.0694	0.0629	0.0578	0.0548	0.0536	0.0538						0.0847	0.0803	0.0718	0.0766						Sc45	0.0431	0.0453	0.0466
Ti47	1.43	1.46	1.33	1.35	1.38	1.42	1.46	1.38						1.98	1.98	2.1	2.13	2.15						Ti47	0.548	0.551	0.652	0.667	0.652	0.655	0.682						0.668	0.903	0.832	0.917						Ti47	0.603	0.655	0.68
V51	0.0777	0.0774	0.0733	0.0713	0.0755	0.0747	0.0759	0.0741						0.107	0.106	0.115	0.118	0.116						V51	0.0526	0.0529	0.0535	0.0514	0.0521	0.052	0.0533						0.0652	0.0716	0.0692	0.0741						V51	0.0525	0.0524	0.0539
Cr52	1.39	1.42	1.36	1.28	1.35	1.39	1.5	1.44						1.98	2.08	2.07	2.15	2.15						Cr52	0.78	0.785	0.785	0.751	0.767	0.761	0.778						0.956	1.04	1	1.06						Cr52	1.34	1.21	1.1
Mn55	0.964	0.984	0.92	0.92	0.951	0.971	0.984	0.934						1.36	1.38	1.45	1.48	1.46						Mn55	0.554	0.566	0.578	0.567	0.592	0.621	0.646						0.693	0.792	0.789	0.869						Mn55	0.616	0.621	0.621
Co59	0.247	0.244	0.202	0.194	0.199	0.21	0.215	0.203						0.31	0.297	0.297	0.307	0.311						Co59	0.0139	0.014	0.0187	0.0217	0.0244	0.0256	0.0275						0.0177	0.0284	0.0312	0.0347						Co59	0.0414	0.0393	0.0339
Ni60	0.278	0.285	0.292	0.305	0.318	0.334	0.338	0.327						0.398	0.435	0.475	0.506	0.514						Ni60	0.164	0.165	0.214	0.23	0.245	0.265	0.269						0.215	0.315	0.314	0.356						Ni60	0.153	0.177	0.22
Cu63	0.0903	0.087	0.0735	0.0712	0.0696	0.0752	0.075	0.0691						0.113	0.111	0.109	0.112	0.111						Cu63	0.0197	0.0185	0.0213	0.0235	0.0226	0.0219	0.0223						0.0238	0.0314	0.0304	0.031						Cu63	0.0226	0.0251	0.0257
Zn66	0.41	0.403	0.349	0.316	0.303	0.319	0.299	0.247						0.556	0.505	0.491	0.466	0.411						Zn66	0.487	0.469	0.423	0.365	0.323	0.284	0.267						0.573	0.511	0.418	0.395						Zn66	0.416	0.386	0.345
Ga71	0.0168	0.0138	0.013	0.0168	0.0173	0.0193	0.0167	0.0159						0.021	0.0208	0.0233	0.026	0.0254						Ga71	0.00814	0.0101	0.00866	0.00703	0.00961	0.00919	0.0118						0.011	0.0117	0.012	0.0124						Ga71	0.00627	0.00899	0.00827
As75	0.176	0.167	0.138	0.135	0.127	0.124	0.125	0.12						0.209	0.207	0.204	0.202	0.192						As75	0.108	0.0996	0.0748	0.0668	0.0588	0.0491	0.0488						0.117	0.0935	0.0711	0.0801						As75	0.0591	0.0586	0.0632
Se77	0.956	0.98	0.803	0.76	0.756	0.832	0.708	0.69						1.27	1.14	1.19	1.17	1.13						Se77	0.52	0.517	0.404	0.349	0.3	0.254	0.248						0.609	0.486	0.397	0.375						Se77	0.275	0.278	0.259
Rb85	0.0114	0.0115	0.0115	0.0117	0.00997	0.0117	0.0111	0.0105						0.0169	0.0161	0.0159	0.0172	0.0171						Rb85	0.00901	0.00853	0.00817	0.00798	0.00731	0.00823	0.00819						0.0104	0.0106	0.01	0.0117						Rb85	0.00743	0.00727	0.00724
Sr88	0.0576	0.0582	0.0625	0.065	0.0686	0.0719	0.0776	0.0746						0.082	0.0929	0.102	0.11	0.116						Sr88	0.0064	0.00631	0.00818	0.00904	0.00981	0.0117	0.0141						0.00862	0.0123	0.0125	0.0157						Sr88	0.0113	0.0121	0.0146
Y89	0.00235	0.00212	0.0021	0.00212	0.00374	0.00357	0.00351	0.0031						0.00359	0.00424	0.00488	0.00482	0.00448						Y89	0.00151	0.002	0.0016	0.00228	0.00177	0.00186	0.00189						0.00238	0.00215	0.00256	0.00284						Y89	0.00124	0.00165	0.00194
Zr91	0.057	0.0619	0.0624	0.0645	0.0666	0.0768	0.0801	0.0851						0.0841	0.0956	0.107	0.112	0.118						Zr91	0.0347	0.0327	0.043	0.0386	0.0377	0.0425	0.0386						0.0415	0.0572	0.0478	0.0541						Zr91	0.0217	0.0282	0.034
Nb93	0.0024	0.00215	0.00148	0.0015	0.00109	0.00216	0.00306	<0.00000						<0.00000	0.00272	0.00168	0.00368	0.00218						Nb93	0.00114	0.00095	0.00081	0.00071	0.00078	0.00051	0.00074						0.0015	0.0012	0.00123	0.00089						Nb93	0.00081	0.00105	0.00105
Cd111	0.0653	0.0653	0.0592	0.0645	0.0706	0.0629	0.0575	0.0637						0.0851	0.0721	0.0854	0.079	0.0772						Cd111	0.0248	0.0312	0.0271	0.0305	0.033	0.0197	<0.00000						0.0244	0.0305	0.037	0.0376						Cd111	0.026	0.0346	0.0174
Sn118	0.0615	0.0628	0.0585	0.0614	0.0588	0.066	0.0641	0.0632						0.0815	0.0881	0.0974	0.0949	0.096						Sn118	0.027	0.0288	0.0261	0.0254	0.027	0.0258	0.027						0.0357	0.0368	0.0348	0.0382						Sn118	0.0246	0.0233	0.0259
Cs133	0.00654	0.00655	0.00474	0.00612	0.00522	0.00591	0.00593	0.00587						0.00877	0.00886	0.00847	0.00822	0.0102						Cs133	0.00584	0.00587	0.00518	0.00522	0.0047	0.00542	0.0054						0.0069	0.00709	0.00635	0.00758						Cs133	0.00415	0.00451	0.00477
Ba137	0.0317	0.0348	0.0328	0.0294	0.0329	0.0406	0.0429	0.0365						0.0429	0.0529	0.0521	0.0449	0.0594						Ba137	0.00989	0.0101	0.01	0.00978	0.0113	0.00913	0.00926						0.0142	0.0128	0.014	0.0124						Ba137	0.0143	0.0134	0.0115
La139	0.00331	0.00417	0.00485	0.00389	0.00456	0.00429	0.00553	0.00419						0.00362	0.00738	0.00736	0.00631	0.00845						La139	0.0011	0.00053	0.00098	0.00124	0.00102	0.00161	0.00124						0.00046	0.00204	0.00146	0.00162						La139	0.00103	0.00067	0.00123
Ce140	0.00237	0.00174	0.00222	0.00259	0.00269	0.00286	0.00384	0.00227						0.00241	0.00271	0.00438	0.0057	0.00274						Ce140	0.00035	0.00036	<0.00000	0.00077	0.00094	0.00129	0.00094						0.00089	0.002	<0.00000	0.00101						Ce140	0.00051	0.00102	<0.00000
Pr141	0.00155	0.00144	0.00075	<0.00000	0.00079	0.00118	0.00152	0.00167						0.00141	0.00159	0.00242	<0.00000	<0.00000						Pr141	0.00038	0.00055	0.00042	0.00052	0.00087	0.00033	0.0007						0.00034	<0.00000	0.00082	<0.00000						Pr141	0.00065	<0.00000	0.00057
Nd146	0.00504	0.00523	0.00271	0.00776	0.00492	0.00903	0.00948	0.00734						0.0102	0.00576	0.0107	0.0101	0.0105						Nd146	0.00107	0.00269	0.0017	0.00209	0.00174	0.00268	0.00316						0.00333	0.00168	0.00234	<0.00000						Nd146	<0.00000	<0.00000	0.00228
Sm147	0.00417	<0.00000	0.0071	<0.00000	0.00817	0.00354	0.00644	0.005						0.00947	0.0117	0.00887	0.00922	0.00552						Sm147	0.00314	0.00227	<0.00000	<0.00000	0.00208	<0.00000	0.00168						0.00162	<0.00000	0.00279	0.00228						Sm147	0.00392	0.00148	0.00222
Eu151	0.00253	0.0014	0.00178	<0.00000	0.00186	0.00227	0.00291	0.00276						0.00275	0.00308	0.00286	0.00484	0.00177						Eu151	0.00058	0.00111	0.00091	0.00064	0.0008	0.00099	0.00117						0.00052	0.00064	0.00152	0.00071						Eu151	0.00138	0.00093	0.0007
Gd157	0.0155	0.0143	0.0148	0.0173	0.0167	0.0189	0.0162	0.0167						0.0192	0.0188	0.0251	0.0278	0.0306						Gd157	0.00557	0.00416	<0.00000	0.00398	0.0041	0.00548	0.00725						0.00364	0.00641	0.00389	0.00522						Gd157	0.00529	0.00294	0.00256
Tb159	0.00182	0.00113	0.00216	0.00264	0.00299	0.00494	0.00336	0.00332						0.00252	0.00323	0.00394	0.00576	0.00447						Tb159	0.00051	0.00052	0.00051	0.00071	0.00099	0.00094	0.00136						0.00041	0.00122	0.00113	0.00117						Tb159	0.00107	0.00085	0.00118
Dy163	0.0105	0.00891	0.00765	0.00989	0.00902	0.012	0.011	0.0113						0.0141	0.0143	0.0128	0.0163	0.0125						Dy163	<0.00000	<0.00000	0.00107	0.00107	0.00217	0.00232	0.00121						0.00122	0.00258	0.00145	0.00166						Dy163	<0.00000	0.00243	<0.00000
Ho165	<0.00000	0.00079	0.00058	<0.00000	0.00086	<0.00000	0.00117	0.0011						0.00109	0.0015	0.00093	<0.00000	<0.00000						Ho165	0.00086	0.00051	0.00087	<0.00000	0.00028	0.00072	<0.00000						0.00063	0.00085	0.00091	0.0006						Ho165	<0.00000	<0.00000	0.00042
Er167	<0.00000	0.00246	<0.00000	0.00258	0.00267	0.00401	0.00297	0.00281						0.00341	0.00383	<0.00000	0.00426	0.00623						Er167	0.00154	<0.00000	<0.00000	<0.00000	<0.00000	0.00224	<0.00000						<0.00000	<0.00000	0.00162	0.00184						Er167	0.00161	0.00121	0.00182
Tm169	0.00195	0.00165	0.00135	0.00293	0.00219	0.00268	0.00262	0.0023						0.00302	0.00363	0.00363	0.00439	0.00232						Tm169	0.00037	0.00027	0.00058	<0.00000	<0.00000	0.00031	0.00032						<0.00000	0.0008	0.00055	<0.00000						Tm169	0.00081	0.0005	0.00031
Yb173	0.00765	0.00563	0.00714	0.00831	0.00608	0.0091	0.0126	0.0101						0.011	0.00873	0.0132	0.0217	0.0212						Yb173	0.00177	<0.00000	<0.00000	<0.00000	0.00437	0.00207	0.00215						0.00316	0.00383	<0.00000	0.00296						Yb173	<0.00000	<0.00000	<0.00000
Lu175	0.0021	0.00218	0.00263	0.00292	0.0031	0.00384	0.00461	0.0041						0.00272	0.00338	0.00438	0.00621	0.00586						Lu175	0.00031	<0.00000	0.00034	0.00089	0.00122	0.0005	0.00161						0.00068	0.00169	0.00111	0.00114						Lu175	0.00119	0.00107	0.00134
Hf177	0.00312	<0.00000	<0.00000	0.00338	<0.00000	0.00738	0.00385	0.00363						0.00633	0.00869	<0.00000	0.00554	<0.00000						Hf177	0.00168	0.00243	<0.00000	<0.00000	0.00249	<0.00000	<0.00000						0.00299	0.0025	0.00236	0.00369						Hf177	0.00234	<0.00000	0.00262
Ta181	0.0021	0.00204	0.0021	0.00266	0.00218	0.00302	0.00272	0.00331						0.00261	0.00377	0.00459	0.00185	0.00381						Ta181	<0.00000	<0.00000	0.00102	0.00089	0.00075	0.00109	0.00128						<0.00000	0.00108	0.001	<0.00000						Ta181	0.00091	0.00115	0.00079
Au197	0.00627	0.0041	0.00658	0.00581	0.00589	0.0081	0.00579	0.00694						0.00939	0.00695	0.00862	0.00859	0.00971						Pb208	0.00438	0.00401	0.00432	0.00479	0.00416	0.0035	0.00445						0.00516	0.00533	0.00587	0.00603						Pb208	0.00379	0.00359	0.00388
Pb208	0.00645	0.0074	0.00714	0.00666	0.00724	0.00721	0.00819	0.00754						0.00712	0.0114	0.0104	0.0126	0.0102						Th232	0.00066	0.00058	0.00036	<0.00000	<0.00000	0.00034	<0.00000						<0.00000	0.00048	0.00044	0.00048						Th232	0.00062	<0.00000	0.0007
Th232	<0.00000	<0.00000	<0.00000	<0.00000	<0.00000	<0.00000	<0.00000	<0.00000						<0.00000	<0.00000	<0.00000	<0.00000	<0.00000						U238	0.00025	0.00036	0.00028	0.00039	0.00028	<0.00000	<0.00000						<0.00000	0.00038	<0.00000	<0.00000						U238	<0.00000	0.00028	<0.00000
U238	<0.00000	<0.00000	<0.00000	<0.00000	<0.00000	<0.00000	<0.00000	<0.00000						<0.00000	<0.00000	<0.00000	<0.00000	<0.00000
[truncated: 15 more columns]

## Sheet: Table S3
Table S3. Operating conditions for the LA-ICP-MS equipment.
Laboratory & Sample Preparation
Laboratory name	GeOHeLiS Analytical Platform, OSUR, Univ Rennes 1, France
Sample type/mineral	Apatite
Laser ablation system
Make, Model & type	ESI NWR193UC, Excimer
Ablation cell	ESI NWR TwoVol2
Laser wavelength	193 nm
Pulse width	< 5 ns
Fluence	6.3 J/cm2
Repetition rate	5Hz
Spot size	50 μm
Sampling mode / pattern	Single spot
Carrier gas	100% He, Ar make-up gas and N2 (3 ml/mn) combined using in-house smoothing device
Background collection	20 seconds
Ablation duration	60 seconds
Wash-out delay	15 seconds
Cell carrier gas flow (He)	0.75 l/min
ICP-MS Instrument
Make, Model & type	Agilent 7700x, Q-ICP-MS
Sample introduction	Via conventional tubing
RF power	1350W
Sampler, skimmer cones	Ni
Extraction lenses	X type
Make-up gas flow (Ar)	0.75 l/min
Detection system	Single collector secondary electron multiplier
Data acquisition protocol	Time-resolved analysis
Scanning mode	Peak hopping, one point per peak
Detector mode	Pulse counting, dead time correction applied, and analog mode when signal intensity > ~ 106 cps
Masses measured	204(Hg + Pb), 206Pb, 207Pb, 208Pb, 232Th, 238U + 43Ca
Integration time per peak	10-30 ms
Sensitivity / Efficiency	23000 cps/ppm Pb (50µm, 10Hz)
Data Processing
Gas blank	20 seconds on-peak
Calibration strategy	Madagascar apatite standard used as primary reference material, McClure and Durango standards used as secondary reference material (quality control)
Common-Pb correction, composition and uncertainty	No common-Pb correction.
Reference Material info	Madagascar (Chew et al. 2014)
	McClure (Schoene and Bowring 2006)
	Durango (McDowell et al. 2005)
Data processing package used	Iolite (Paton et al., 2010), VizualAge_UcomPbine (Chew et al., 2014)
	More information on the procedure in Pochon et al., 2016
Quality control / Validation	McClure: 528.9 ± 3.3 Ma (N=30, MSWD=0.41 ; probability=0.998)
	Durango: 31.8 ± 0.3 Ma (N=36, MSWD=0.3 ; probability=1.000)
References :
Chew DM, Petrus JA, Kamber BS (2014) U–Pb LA–ICPMS dating using accessory mineral standards with variable common Pb. Chemical Geology 363:185-199 doi:https://doi.org/10.1016/j.chemgeo.2013.11.006
McDowell FW, McIntosh WC, Farley KA (2005) A precise 40Ar–39Ar reference age for the Durango apatite (U–Th)/He and fission-track dating standard. Chemical Geology 214(3):249-263 doi:https://doi.org/10.1016/j.chemgeo.2004.10.002
Paton C, Woodhead JD, Hellstrom JC, Hergt JM, Greig A, Maas R (2010) Improved laser ablation U-Pb zircon geochronology through robust downhole fractionation correction. Geochemistry, Geophysics, Geosystems 11(3) doi:10.1029/2009GC002618
Pochon A, Poujol M, Gloaguen E, Branquet Y, Cagnard F, Gumiaux C, Gapais D (2016) U-Pb LA-ICP-MS dating of apatite in mafic rocks: Evidence for a major magmatic event at the Devonian-Carboniferous boundary in the Armorican Massif (France). American Mineralogist 101(11):2430-2442 doi:http://dx.doi.org/10.2138/am-2016-5736
Schoene B, Bowring S (2006) U–Pb systematics of the McClure Mountain syenite: thermochronological constraints on the age of the 40Ar/39Ar standard MMhb. Contributions to Mineralogy and Petrology 151(5):615

## Sheet: Table S4
Table S4. Apatite standard data.
Sample	Identifier	U (ppm)	Th/U	207Pb-corrected age	±2𝝈 (absolute)	f206§
Durango	Durango-1.d	13.8735	26.5007	31.7259	1.31389	0.190749
	Durango-2.d	14.5803	26.7491	32.1778	1.29056	0.183479
	Durango-3.d	14.0123	26.9576	31.1335	1.26526	0.28779
	Durango-4.d	12.5069	33.4915	31.3454	1.98352	0.205648
	Durango-5.d	13.2685	31.88	31.705	1.71985	0.198058
	Durango-6.d	12.3851	32.6933	31.4452	1.41254	0.190432
	Durango-1.d	12.8169	32.0285	31.8957	1.84294	0.218131
	Durango-2.d	11.5269	32.5971	32.1745	1.75948	0.187732
	Durango-3.d	12.2658	32.8576	32.2507	1.69872	0.193868
	Durango-4.d	12.6323	25.3314	32.186	1.77021	0.173233
	Durango-5.d	8.46895	28.4574	31.3389	2.22133	0.286034
	Durango-6.d	14.0412	24.4673	32.0384	1.76238	0.171899
	Durango-1.d	13.2918	32.387	31.9301	1.95393	0.180373
	Durango-2.d	13.2075	32.655	32.4868	1.94103	0.203282
	Durango-3.d	14.9127	24.7574	32.332	1.95378	0.16942
	Durango-4.d	14.0489	32.5213	32.0656	1.92795	0.203381
	Durango-5.d	15.4527	26.2345	31.7951	1.93381	0.162898
	Durango-6.d	13.2277	33.6657	31.5981	1.92578	0.176818
	Durango-1.d	17.7362	25.06	32.4117	2.82493	0.238112
	Durango-2.d	19.7594	27.8751	31.3391	2.8634	0.162029
	Durango-3.d	19.5606	25.2251	32.171	2.5473	0.159143
	Durango-4.d	13.0801	39.3324	32.0911	2.57769	0.244954
	Durango-5.d	15.9432	28.6912	31.7736	2.52604	0.218769
	Durango-6.d	14.0213	38.639	32.1918	2.62508	0.242273
	Durango-1.d	12.0788	38.1938	31.5044	1.75694	0.24103
	Durango-2.d	14.0089	27.9121	31.4541	1.48418	0.191391
	Durango-3.d	12.6579	24.2602	32.1412	1.51494	0.203736
	Durango-4.d	11.9281	27.1515	31.5709	1.64499	0.185549
	Durango-5.d	15.1098	24.3387	31.1654	1.5241	0.167202
	Durango-6.d	16.0159	25.2122	32.1927	1.49791	0.177067
	Durango-1.d	16.5694	23.2091	31.4547	1.47285	0.171222
	Durango-2.d	12.2106	26.7512	31.3488	1.59556	0.205117
	Durango-3.d	12.5513	24.703	32.32	1.62211	0.208193
	Durango-4.d	12.8	24.4187	30.341	1.56332	0.271055
	Durango-5.d	15.524	23.5337	32.054	1.39973	0.178141
	Durango-6.d	10.9546	28.0746	32.0192	1.61185	0.226421
McClure	McClure-1.d	12.2011	3.98775	523.68	12.2099	0.216841
	McClure-2.d	12.7888	3.67729	524.531	11.912	0.20138
	McClure-3.d	20.1214	4.31518	528.842	14.6932	0.112439
	McClure-4.d	5.89982	3.89376	532.631	16.0581	0.276325
	McClure-5.d	4.88566	3.91215	522.874	13.6296	0.33036
	McClure-6.d	19.0359	4.88455	525.476	11.8114	0.131239
	McClure-1.d	21.8597	4.33679	533.176	22.6319	0.120403
	McClure-3.d	21.4131	5.16962	524.682	21.9735	0.107335
	McClure-4.d	16.3767	4.986	522.076	23.1751	0.115311
	McClure-5.d	15.2478	4.88479	524.698	22.9264	0.163689
	McClure-1.d	14.3169	4.44232	531.21	25.6665	0.148866
	McClure-2.d	22.6871	4.25436	529.329	24.701	0.153364
	McClure-3.d	16.1597	4.43484	534.036	25.0746	0.172476
	McClure-4.d	11.6289	3.82943	530.657	25.0894	0.199222
	McClure-5.d	12.139	4.43559	531.341	25.288	0.199259
	McClure-6.d	6.18552	3.24224	537.498	25.916	0.239438
	McClure-1.d	18.8504	3.70346	531.701	40.3561	0.233235
	McClure-2.d	8.003	3.40536	530.722	39.0591	0.235598
	McClure-3.d	26.1945	4.90433	508.868	36.0806	0.149418
	McClure-4.d	6.99139	3.71017	527.979	37.736	0.254348
	McClure-6.d	26.4268	5.38747	531.88	38.1053	0.132123
	McClure-1.d	18.6133	4.43113	536.144	17.5374	0.197052
	McClure-2.d	17.1557	3.5053	546.31	19.3477	0.233175
	McClure-3.d	6.32987	3.21134	536.8	18.5364	0.230961
	McClure-4.d	10.3145	4.78053	533.815	24.2807	0.190619
	McClure-5.d	14.8388	4.49046	534.931	17.1465	0.124613
	McClure-1.d	12.0351	3.83256	532.7	16.5247	0.23276
	Durango-2.d	11.8687	3.79879	532.402	17.4309	0.144321
	McClure-3.d	13.7926	4.10689	520.672	17.0861	0.15103
	McClure-4.d	7.67429	3.20728	531.347	18.4298	0.221423
	Durango-5.d	17.6362	6.59122	524.215	18.0296	0.123012
§ refers to the 206Pbcommon/206Pbtotal

## Sheet: Table S5
Table S5. Sedimentary apatite U-Pb isotopic data.
Sample	Identifier	238U/206Pb	±2𝝈 (%)	207Pb/206Pb	±2𝝈 (%)	rho
AMZ 13	S270921c-01.d	27.3732	4.85582	0.643072	0.917917	0.269045
	S270921c-02.d	22.5964	4.78949	0.668824	0.816592	0.365738
	S270921c-03.d	23.2825	4.80631	0.663291	0.922426	0.509627
	S270921c-04.d	37.8001	4.85971	0.634199	1.46359	0.504525
	S270921c-05.d	22.6507	4.86024	0.654733	1.56975	0.403207
	S270921c-06.d	20.3255	4.83795	0.657926	1.16544	0.411264
	S270921c-07.d	18.2896	4.88599	0.681101	1.35352	0.449353
	S270921c-08.d	24.0754	4.79461	0.658733	0.949309	0.396001
	S270921c-09.d	22.4453	4.78453	0.661093	0.959752	0.546347
	S270921c-10.d	36.2279	4.87202	0.621211	1.14411	0.0741465
	S270921c-11.d	27.8151	4.86138	0.661016	1.44227	0.459251
	S270921c-12.d	22.5637	4.89348	0.658645	1.24397	0.447232
	S270921c-13.d	22.731	4.87412	0.675838	1.70434	0.435964
	S270921c-14.d	29.7159	4.92121	0.646628	1.27047	0.499726
	S270921c-15.d	34.8949	4.79941	0.606141	1.02117	0.514186
	S270921c-16.d	33.277	5.10319	0.602123	1.7822	0.145216
	S270921c-17.d	24.5678	4.85565	0.65701	1.08724	0.392662
	S270921c-18.d	23.0741	5.19209	0.64985	1.23294	0.00942392
	S270921c-19.d	19.7471	4.7737	0.67781	0.885708	0.447984
	S270921c-20.d	36.7236	4.78102	0.610147	0.980225	0.501482
	S270921c-21.d	30.81	4.79725	0.640681	0.947314	0.407076
	S270921c-22.d	28.9168	4.85862	0.634734	1.46077	0.453046
	S270921c-23.d	22.8145	4.8336	0.663712	1.26287	0.510541
	S270921c-24.d	39.2228	4.84111	0.578843	1.34056	0.335206
	S270921c-25.d	25.1127	4.69294	0.655562	0.953222	0.535041
	S270921c-26.d	24.5593	4.83033	0.655879	0.955958	0.337392
	S270921c-27.d	31.5802	4.87937	0.635751	0.927478	0.253973
	S270921c-28.d	26.2359	4.83808	0.648827	1.20516	0.535227
	S270921c-29.d	31.2252	4.81294	0.621777	1.19083	0.373366
	S270921c-30.d	27.626	4.78645	0.650296	0.929083	0.440269
	S270921c-31.d	25.9548	4.77613	0.658928	0.826728	0.492574
	S270921c-32.d	33.0327	4.82901	0.616109	1.19968	0.480154
	S270921c-33.d	37.0358	4.78803	0.604256	1.01087	0.514164
	S270921c-34.d	37.7913	4.77849	0.589592	0.990741	0.436016
	S270921c-35.d	38.3832	4.98517	0.601287	2.85826	0.449481
	S270921c-36.d	19.4751	4.80758	0.670454	1.02257	0.43153
AMZ9	S270921a-01.d	12.2804	2.18496	0.754468	0.705751	0.512998
	S270921a-02.d	16.723	2.20811	0.728478	0.798018	0.516587
	S270921a-03.d	11.7127	2.3249	0.747753	0.776205	0.16739
	S270921a-04.d	16.9993	3.12766	0.721392	0.860789	0.0853436
	S270921a-05.d	12.6272	2.70572	0.751652	1.02627	-0.0830647
	S270921a-06.d	8.28171	2.4597	0.754254	1.23779	0.397467
	S270921a-07.d	8.89671	2.21904	0.761457	0.770737	0.457744
	S270921a-08.d	11.2739	2.25725	0.752545	0.938772	0.438385
	S270921a-09.d	11.9029	2.21246	0.746625	0.776367	0.492981
	S270921a-10.d	14.3378	2.2955	0.743313	0.744874	0.39511
	S270921a-11.d	9.51524	2.85445	0.742705	1.26184	0.23552
	S270921a-12.d	9.30368	2.19499	0.766402	0.687712	0.475219
	S270921a-13.d	14.0269	2.29148	0.73225	0.90753	0.36917
	S270921a-14.d	22.6142	2.25489	0.697029	0.820033	0.369937
	S270921a-15.d	18.6551	2.18776	0.7193	0.816308	0.482214
	S270921a-16.d	21.2833	2.77256	0.71067	1.26152	0.229568
	S270921a-17.d	12.6595	2.26332	0.74384	0.956255	0.425685
	S270921a-18.d	13.176	2.22315	0.740154	0.7967	0.373019
	S270921a-19.d	19.4014	2.20872	0.711657	0.793435	0.447212
	S270921a-20.d	11.6642	2.26355	0.755182	0.976503	0.299284
	S270921a-21.d	18.1038	2.32692	0.728089	0.734833	0.204101
	S270921a-22.d	17.0436	2.61598	0.725994	0.783099	0.150709
	S270921a-23.d	11.389	2.26786	0.747768	0.790166	0.437944
	S270921a-24.d	16.2335	2.26286	0.730904	0.926344	0.357834
	S270921a-25.d	12.9648	2.27291	0.748041	0.740948	0.239561
	S270921a-26.d	11.4032	2.36384	0.750923	1.13865	0.526957
	S270921a-27.d	12.5308	2.55335	0.754727	0.948951	0.0866233
	S270921a-28.d	15.2461	2.21163	0.742179	0.762722	0.361536
	S270921a-29.d	18.9883	2.48331	0.727599	0.756118	0.150865
	S270921a-30.d	10.1847	2.27791	0.7578	0.784828	0.292542
	S270921a-31.d	15.8714	2.28804	0.73685	0.777332	0.262892
	S270921a-32.d	16.5415	2.37166	0.736605	0.831767	0.444657
	S270921a-33.d	15.5891	2.33614	0.730681	1.12693	0.327597
	S270921a-34.d	12.2788	2.45933	0.743651	0.933043	0.219778
	S270921a-35.d	19.3825	2.58121	0.734699	0.81817	0.0508577
	S270921a-36.d	16.7228	2.31123	0.727424	1.00694	0.481223
AMZ8	S270921b-01.d	44.6471	4.26669	0.608963	1.02052	0.58045
	S270921b-02.d	46.8656	4.28221	0.59862	0.9871	0.512598
	S270921b-03.d	47.4211	4.35925	0.584553	1.65394	0.542424
	S270921b-04.d	52.536	4.50161	0.533686	1.48836	0.29698
	S270921b-05.d	49.4978	4.2959	0.560002	1.18999	0.480009
	S270921b-06.d	56.7613	4.50854	0.546473	1.46783	0.383559
	S270921b-07.d	29.43	6.30564	0.657733	2.59464	0.115535
	S270921b-08.d	34.2003	4.60971	0.640753	1.9609	0.514792
	S270921b-09.d	36.1063	4.98441	0.597153	3.07332	0.508549
	S270921b-10.d	26.8411	4.63704	0.674486	2.07278	0.59121
	S270921b-11.d	43.0303	4.34515	0.601546	1.34699	0.470862
	S270921b-12.d	52.2168	4.61164	0.547345	1.82861	0.0527118
	S270921b-13.d	47.5443	4.48465	0.589902	1.96206	0.570193
	S270921b-14.d	36.9373	4.81919	0.616057	2.5901	0.475922
	S270921b-15.d	47.3006	4.41544	0.554719	1.86015	0.413083
	S270921b-16.d	36.6583	4.58979	0.602182	2.09686	0.374444
	S270921b-17.d	33.0061	4.55011	0.631783	1.87205	0.454904
	S270921b-18.d	38.4795	4.40131	0.602749	1.58358	0.445859
	S270921b-19.d	37.4939	4.53037	0.635975	1.98831	0.500194
	S270921b-20.d	47.9697	4.40632	0.566542	1.72874	0.529253
	S270921b-21.d	49.6261	4.47706	0.545262	2.08129	0.507096
	S270921b-22.d	37.768	4.70406	0.61059	2.6743	0.567058
	S270921b-23.d	47.8423	4.62911	0.544696	2.24544	0.462281
	S270921b-24.d	37.0433	4.41895	0.619106	1.42016	0.480165
	S270921b-25.d	39.1745	4.80419	0.622554	2.43692	0.410443
	S270921b-26.d	37.594	4.37886	0.617724	1.39458	0.507819
	S270921b-27.d	35.539	4.73587	0.606653	2.86049	0.479862
	S270921b-28.d	36.1682	4.35586	0.605987	1.62843	0.57611
	S270921b-29.d	42.5642	4.53104	0.577008	2.24688	0.484918
	S270921b-30.d	45.8886	4.53896	0.580909	2.04248	0.53359
	S270921b-31.d	42.8134	4.83354	0.587343	2.77777	0.573045
	S270921b-32.d	38.4562	4.90652	0.604201	1.70173	0.100533
	S270921b-33.d	38.5384	4.64803	0.625227	1.83184	0.529279
	S270921b-34.d	45.7329	4.35495	0.58639	1.49598	0.549656
	S270921b-35.d	40.2573	4.64222	0.582755	2.37318	0.650589
	S270921b-36.d	45.5194	4.48035	0.567073	2.00749	0.486413
Omitted data in Tera-Wasserburg plots are in red.

## Sheet: Table S6
Table S6. LA-ICP-MS data and REEY-based proxies of CFA.
Sample	Identifier	Location		Ca43	Sc45	Ti47	V51	Cr52	Mn55	Co59	Ni60	Cu63	Zn66	Ga71	As75	Se77	Rb85	Sr88	Y89	Zr91	Nb93	Cd111	Sn118	Cs133	Ba137	La139	Ce140	Pr141	Nd146	Sm147	Eu151	Gd157	Tb159	Dy163	Ho165	Er167	Tm169	Yb173	Lu175	Hf177	Ta181	Pb208	Th232	U238	∑REE	Y/Ho		BSI	(Sm/Yb)SN
				(ppm)	ppm	ppm	ppm	ppm	ppm	ppm	ppm	ppm	ppm	ppm	ppm	ppm	ppm	ppm	ppm	ppm	ppm	ppm	ppm	ppm	ppm	ppm	ppm	ppm	ppm	ppm	ppm	ppm	ppm	ppm	ppm	ppm	ppm	ppm	ppm	ppm	ppm	ppm	ppm	ppm	ppm
AMZ13	ba_28	edge		385939	1.553	183.26	35.97	154.35	3.54	1.296	12.52	10.18	77.42	3.38	4.96	5.01	5.4	1850.1	52.19	10.55	0.431	1.85	0.319	0.318	26.03	31.74	27.42	4.36	18.53	3.43	0.953	4.24	0.621	4.13	0.964	2.99	0.404	3	0.484	0.147	0.0284	4.64	1.028	39.5	103.266	54.139		0.966152	0.582997
	ba_29	core		385939	1.23	102	33.71	120.36	9.45	1.38	12.08	13.55	92.07	2.98	5.02	5.25	4.53	1922.74	44.59	7.33	0.192	1.36	0.393	0.217	25.74	27.72	24.37	4.01	16.49	3.14	0.873	4.07	0.565	3.62	0.865	2.58	0.359	2.47	0.449	0.11	0.019	4.89	0.93	32.52	91.581	51.5491		1.00329	0.648226
	ba_30	edge		385939	1.536	149.83	39.24	136.21	12.62	1.46	15.48	9.63	95.6	3.76	4.36	6.12	5.27	1934.69	81.95	9.01	0.302	1.37	0.478	0.329	23.51	48.45	44.78	7.27	29.69	5.63	1.443	7.05	1.016	6.6	1.567	4.68	0.637	4.52	0.746	0.115	0.0187	4.64	0.918	43.05	164.079	52.2974		1.00484	0.635131
	ba_31	core		385939	1.656	694.47	43.06	146.22	12.34	1.45	14.58	9.52	90.43	3.94	4.32	4.22	10.24	1852.86	60.38	12.42	1.954	1.67	0.595	0.543	26.31	38.18	29.34	4.43	18.46	3.53	0.86	4.67	0.602	3.94	0.987	3.06	0.443	3.23	0.521	0.174	0.1669	5.25	0.727	51.23	112.253	61.1753		0.927031	0.55727
	ba_32	edge		385939	1.868	332.28	42.52	166.53	9.43	1.35	16.16	9.71	91.75	4.02	4.68	5.42	7.12	1798.42	107.05	13.01	0.859	1.75	0.441	0.443	26.38	64.29	53.27	8.14	35.21	6.31	1.693	8.6	1.143	7.75	1.825	5.62	0.85	5.76	0.988	0.177	0.0464	5.34	0.994	59.66	201.449	58.6575		0.948444	0.558599
	ba_33	core		385939	1.65	266.27	37	122.11	14.16	1.22	16.13	9.88	105.25	3.51	3.49	3.5	6.18	1834.79	49.4	11.14	0.692	2.22	0.467	0.457	24.02	27.62	25.95	4.17	17.6	3.43	0.964	4.49	0.613	4.09	0.913	2.83	0.384	2.72	0.437	0.125	0.0383	3.58	0.01	30.12	96.211	54.1073		1.06432	0.643011
	ba_34	core		385939	1.182	132.64	43.81	123.62	8	1.282	14.72	9.56	111.19	2.84	3.51	3.26	4.28	1828.71	32.6	5.88	0.278	1.68	0.379	0.29	20.32	20.02	17.21	2.76	11.51	2.31	0.64	2.77	0.381	2.69	0.606	1.908	0.266	1.67	0.302	0.087	0.0239	3.92	0.399	46.43	65.043	53.7954		1.01911	0.705324
	ba_35	edge		385939	1.445	229.68	39.86	162.38	7.44	1.118	16.29	8.51	89.27	3.19	3.53	4.43	3.88	1894.14	71.97	9.62	0.468	1.06	0.583	0.237	21.17	40.78	35.59	5.72	24.28	4.61	1.181	5.76	0.793	5.46	1.294	3.99	0.559	4.06	0.674	0.103	0.0229	3.75	0.532	55.08	134.751	55.6182		0.968376	0.578986
	ba_36	core		385939	1.444	164.8	33.53	94.48	16.46	1.3	12.9	11.17	90.29	3.41	5.08	4.38	5.78	1797.11	47.59	6.31	0.37	2.44	1.075	0.354	28.13	28.34	27.16	4.36	18.64	3.72	0.947	4.43	0.599	4.21	0.974	2.98	0.422	2.61	0.463	0.1	0.0181	5.27	0.723	36.26	99.855	48.8604		1.04526	0.726768
	ba_37	edge		385939	1.191	103.41	30.43	120.03	6.89	0.667	12.89	8.98	84.7	2.95	4.03	3.47	3.67	1838.44	39.89	7	0.216	1.22	0.395	0.239	22.26	25.39	21.65	3.46	14.33	2.78	0.727	3.53	0.472	3.13	0.73	2.32	0.327	2.23	0.363	0.0631	0.013	4.5	0.633	36.72	81.439	54.6438		0.996014	0.635672
	ba_38	core		385939	1.252	133	36.39	136.27	8.54	1.02	14.43	8.96	99.2	3.39	3.44	4.34	3.91	1870.87	54.18	7.61	0.329	1.07	0.407	0.238	21.8	33.47	28.21	4.39	19.25	3.67	0.91	4.72	0.61	4.23	1.023	3.09	0.431	3.1	0.502	0.064	0.0119	4.4	0.446	45.55	107.606	52.9619		0.991061	0.603668
	ba_39	core		385939	1.177	126.7	40.11	111.19	8.33	0.89	14.44	10.08	113.11	3.07	4.42	3.79	4.15	1804.97	47.73	7.39	0.34	1.54	0.376	0.263	24.09	29.06	22.51	3.78	16.18	3.07	0.768	3.82	0.494	3.59	0.849	2.75	0.378	2.49	0.44	0.07	0.0173	5.16	0.444	49.36	90.179	56.2191		0.960349	0.628684
	ba_40	core		385939	1.13	54.91	20.66	73.57	37.25	0.89	7.16	4.91	42.02	1.759	2.34	2.86	1.945	1167.59	36.81	4.36	0.1173	4.49	0.232	0.1174	12.93	22.22	18.15	3.11	12.61	2.51	0.609	3.07	0.401	2.9	0.606	2	0.307	2.07	0.356	0.0428	0.0088	2.41	0.479	29.08	70.919	60.7426		0.994431	0.618297
AMZ9	ba_16	core		385939	2.77	756.43	44.16	198.13	31.77	1.81	17.85	15.56	218.54	6.43	6.85	16.83	17.72	1939.01	104.56	13.85	2.276	7.9	0.64	1.088	36.18	59.65	75.41	11.02	48.05	9.01	2.171	10.2	1.379	9.28	2.117	6.23	0.883	6.15	1.021	0.253	0.254	11.49	2.305	43.32	242.571	49.3906		1.06852	0.747039
	ba_17	core		385939	2.44	294.49	40.13	174.71	37.66	1.45	17.55	12.24	147.86	5.87	5.43	14.87	12.37	1960.41	130.64	12.37	0.811	6.07	0.39	0.76	26.11	70.77	90.42	14.43	62.22	12.2	2.652	13.58	1.823	11.94	2.654	8.16	1.161	7.93	1.237	0.203	0.0682	8.53	2.011	46.75	301.177	49.2238		1.11371	0.784477
	ba_18	core		385939	1.685	404.43	36.73	119.23	25.65	1.43	15.3	11.78	148.58	4.14	5.05	12.21	8.58	1911.28	58.77	8.56	0.865	6.25	0.483	0.558	28.48	37.46	39.11	5.72	23.95	4.44	1.028	5.19	0.651	4.71	1.075	3.3	0.481	3.13	0.511	0.148	0.0662	8.86	0.852	42.43	130.756	54.6698		1.0131	0.723323
	ba_19	core		385939	2.61	558.88	47.23	151.48	58.02	1.94	19.74	18.1	367.4	5.2	6.61	13.47	18.81	1908.9	34.15	12.55	1.6	7.49	0.676	1.127	34.08	24.37	30.82	4.38	18.71	3.49	0.834	3.75	0.517	3.21	0.729	2.101	0.325	2.33	0.344	0.246	0.0951	10.8	1.349	42.33	95.91	46.845		1.05399	0.763771
	ba_20	edge		385939	2.548	420.52	42.58	155.32	50.54	1.59	16.99	14.17	240.89	5.26	6.05	14.84	15.52	1913.21	61.97	13.51	1.219	8.88	0.585	0.909	31.4	39.79	56.28	8.09	35.01	6.85	1.533	6.89	0.94	6.43	1.382	4.17	0.592	3.87	0.629	0.211	0.0858	10.54	1.915	43.95	172.456	44.8408		1.1236	0.902554
	ba_21	core		385939	2.24	378.71	44.3	144.74	62.22	2.2	18.51	15.23	193.49	5.12	6.42	16.19	13.58	1945.06	69.9	11.93	0.975	14.53	0.547	0.87	32.54	48.27	61.72	8.54	35.86	6.95	1.594	7.56	1.008	6.63	1.388	4.14	0.607	4.31	0.705	0.226	0.0675	10.53	1.426	57.18	189.282	50.3602		1.10166	0.822245
	ba_22	core		385939	3.41	817.86	59.43	189.93	40.25	2.69	22.55	17.97	382.32	7.02	7.02	15	23.61	1898.58	89.29	17.16	1.973	10.08	0.68	1.43	41.65	56.49	71.2	9.6	41.26	7.44	1.784	8.69	1.188	7.65	1.717	5.31	0.722	5.21	0.864	0.269	0.1381	11.92	2.241	41.77	219.125	52.0035		1.03951	0.728163
	ba_23	core		385939	1.989	388.66	40.46	136.06	23.64	1.65	16.7	14.12	214.67	4.38	5.34	11.98	11.37	1942.28	50.63	9.12	0.959	6.47	0.56	0.687	27.27	33.12	35.35	5.06	20.91	3.67	0.884	4.3	0.589	3.98	0.923	2.76	0.399	3.08	0.495	0.12	0.0747	8.96	1.005	48.49	115.52	54.8537		0.949693	0.607587
	ba_24	core		385939	2.068	492.5	48.77	160.01	82.87	1.64	13.82	20.37	138.85	4.46	7.64	17.18	15.12	2118.62	30.84	10.76	1.285	8.7	0.498	0.927	37.81	21.63	27.88	3.97	16.7	3.27	0.834	3.37	0.475	3.11	0.658	1.938	0.277	2.05	0.309	0.17	0.0794	11.88	2.372	30.98	86.471	46.8693		1.10194	0.813368
	ba_25	edge		385939	2.6	509.94	52.42	149.13	48.53	2.2	18.55	19.16	361.28	5.67	6.38	14.73	17.11	1949.11	53.52	11.13	1.268	9.24	0.753	1.057	33.69	36.3	50.45	6.89	29.6	5.51	1.264	6.24	0.814	5.48	1.153	3.59	0.511	3.53	0.618	0.226	0.0978	12.01	1.39	44.85	151.95	46.418		1.09132	0.795922
	ba_26	core		385939	3.47	573.65	53.2	199.5	39.4	1.99	20.26	15.96	271.13	7.38	6.56	17.35	22.4	1899.87	129.74	21.95	1.477	8.64	0.599	1.373	41.28	70.93	97.77	15.4	66.64	13.08	3.02	14.31	1.956	13.28	2.87	8.38	1.231	8.18	1.376	0.352	0.1108	11.43	2.307	55.71	318.423	45.2056		1.13742	0.815357
	ba_27	core		385939	2.174	329.74	33.27	164.75	84.87	1.02	12.49	18.28	146.76	4.71	7.34	16.94	9.42	1976.9	93.78	11.12	0.919	7.38	0.428	0.627	31.77	49.66	63.33	9.98	43.51	8.6	2.144	9.92	1.345	8.61	1.896	5.9	0.816	5.82	0.915	0.142	0.0446	11.03	3.98	42.85	212.446	49.462		1.12447	0.753475
AMZ8	ba_1	core		385939	1.706	407.56	72.41	132.56	15.98	1.37	15.32	12.76	51.43	3.16	8.07	3.12	8.16	1901.78	29.6	8.75	1.23	1.74	0.364	0.521	23.63	21.21	20.55	2.68	11.03	2.077	0.524	2.6	0.372	2.432	0.525	1.503	0.231	1.66	0.26	0.144	0.0901	2.85	0.576	59.76	67.654	56.381		1.01073	0.638002
	ba_2	core		385939	2.024	245.26	77.58	131.84	22.62	1.38	18.12	11.07	70.11	4.44	10.44	b.d.	8.37	1787.1	67.84	8.46	0.571	3.58	1.109	0.522	24.53	45.72	57.58	7.11	30.44	5.89	1.576	7.47	0.966	6.13	1.345	3.99	0.552	3.61	0.585	0.148	0.0443	3.42	0.694	60.12	172.964	50.4387		1.14394	0.831958
	ba_3	core		385939	1.785	223.04	77.42	113.98	22.26	1.229	12.75	13.1	74.72	3.25	10.17	1.1	7.89	1856.52	23.12	6.18	0.523	2.33	0.462	0.474	21.63	16.92	18.48	2.535	10.82	1.969	0.511	2.41	0.333	2.106	0.469	1.351	0.1762	1.394	0.1997	0.119	0.0313	3.16	0.571	56.53	59.6739	49.2964		1.07875	0.720239
	ba_4	core		385939	1.868	242.05	96.6	142.77	18.12	1.55	17.24	12.47	85.46	3.79	11.28	1.63	8.05	1802.56	48.36	9.54	0.595	3.85	0.495	0.498	23.04	31.46	35.13	5.01	21.12	4.17	1.062	5.13	0.687	4.39	0.964	2.8	0.414	2.81	0.46	0.161	0.0408	3.49	1.018	56.38	115.607	50.166		1.10865	0.756699
	ba_5	core		385939	1.56	352.7	70.66	125.42	16	1.259	13.83	8.11	55.47	3.28	10.31	2.2	5.77	1925.35	55.19	8.94	0.723	3.3	0.361	0.374	21.95	34.57	33.77	4.99	21.35	3.88	0.95	4.96	0.653	4.38	1.029	2.97	0.438	3.22	0.488	0.0666	0.0656	3.13	0.819	47.76	117.648	53.6346		1.00799	0.614426
	ba_6	core		385939	1.606	309.79	74.8	143.45	13.38	1.23	16.91	9.79	58.17	3.66	11.08	2.58	6.57	1860.45	64.83	7.62	0.706	3.8	0.404	0.425	21.33	38.94	39.32	5.75	25.04	4.74	1.183	5.87	0.783	5.5	1.249	3.99	0.502	3.62	0.564	0.132	0.0449	3.31	0.813	53.74	137.051	51.9055		1.04441	0.667672
	ba_7	edge		385939	2.096	183.8	79.36	203.84	10.21	0.652	20.64	10.82	61.33	4.99	7.73	5.56	6.24	1664.38	121.6	9.45	0.398	3.19	0.443	0.382	17.78	68.31	87	13.99	60.08	12.86	3.3	14.54	1.951	12.65	2.675	7.85	1.095	7.26	1.092	0.133	0.0366	2.69	2.553	64.05	294.653	45.4579		1.24358	0.903229
	ba_8	edge		385939	2.072	297.72	75.05	184.36	18.85	1.578	17.09	9.41	61.98	4.83	10.96	3.77	8.73	1924.27	86.07	18.23	0.662	2.41	0.418	0.52	22.9	55	69.42	9.62	41.61	8.34	2.071	10.15	1.345	8.65	1.771	5.32	0.739	5	0.782	0.376	0.048	3.27	1.075	54.62	219.818	48.5997		1.20362	0.85053
	ba_9	core		385939	1.981	216.73	97.52	116.77	26.47	1.5	14.97	12.93	92.99	3.66	10.72	1.92	8.7	1830.81	33.33	6.3	0.534	2.34	0.396	0.517	23.61	24.12	28.89	3.8	15.47	3.16	0.784	3.65	0.501	3.07	0.719	2.001	0.28	1.989	0.281	0.11	0.0405	2.92	0.712	53.17	88.715	46.3561		1.11572	0.810113
	ba_10	edge		385939	1.838	263.99	88.87	140.43	22.8	1.5	16.24	10.64	78.58	4.83	11.51	3.86	7.44	1804.83	78.66	7.91	0.631	5.24	0.346	0.442	21.71	50.94	68.38	9.47	40.31	8.69	2.173	10.04	1.325	8.33	1.804	5.05	0.691	4.34	0.717	0.144	0.0457	3.4	1.537	66.54	212.26	43.6031		1.26618	1.02099
	ba_11	core		385939	1.73	480.55	71.74	143.75	14.19	1.039	15.01	9.41	55.66	4.26	12.45	2.3	7.16	1824.99	93.74	10.09	1.027	4.25	0.529	0.438	23.26	58.14	57.4	8.46	35.11	6.98	1.678	8.59	1.122	7.7	1.738	5.12	0.719	5.08	0.85	0.119	0.0662	3.33	0.928	65.89	198.687	53.9356		1.05873	0.700624
	ba_12	core		385939	1.527	223.99	73.12	110.09	13.58	1.12	12.92	10.5	57.17	3.65	12.65	1.99	7.27	1787.24	44.6	6.58	0.571	4.02	0.526	0.443	24.07	32.64	36.51	4.68	19.92	3.52	0.947	4.72	0.623	3.88	0.893	2.68	0.367	2.48	0.413	0.106	0.0312	3.79	0.646	65.63	114.273	49.944		1.04951	0.723743
	ba_13	core		385939	1.92	233.82	88.72	126.11	18.14	1.43	17.67	14.55	78.14	4.12	9.62	1.92	9.44	1795.23	49.93	9.37	0.519	2.5	0.527	0.599	25.92	35.9	43.91	5.41	22.77	4.29	1.138	5.26	0.729	4.77	0.991	2.89	0.415	2.77	0.434	0.237	0.0328	3.04	0.711	57.19	131.677	50.3835		1.11571	0.789716
	ba_14	edge		385939	1.77	341.4	67.88	129.64	16.12	1.5	20.02	10.46	51.34	5.11	10.37	4.96	6.89	1802.54	99.28	8.42	0.806	2.37	0.423	0.421	21.91	63.3	83.41	12.03	51.41	10.78	2.677	12.35	1.635	10.46	2.176	6.15	0.869	5.76	0.87	0.125	0.0678	2.581	1.214	64.2	263.877	45.625		1.25711	0.954311
	ba_15	core		385939	1.524	151.06	64.22	139.74	52.06	1.25	17.57	10.08	54	3.82	9.88	3.09	4.45	1927.97	77.51	7.96	0.29	5.29	0.297	0.249	18.77	47.13	55.04	8.17	35.04	7.33	1.795	8.35	1.118	7.4	1.624	4.76	0.637	4.48	0.717	0.111	0.0175	2.85	1.038	53.36	183.591	47.7278		1.16397	0.834295
b.d. refers to below detection
[truncated: 14 more columns]

## Sheet: Table S7
Table S7. LA-ICP-MS data of clay minerals.
Sample	Identifier		Si29	Ca43	Sc45	Ti47	V51	Cr52	Mn55	Co59	Ni60	Cu63	Zn66	Ga71	As75	Se77	Rb85	Sr88	Y89	Zr91	Nb93	Cd111	Sn118	Cs133	Ba137	La139	Ce140	Pr141	Nd146	Sm147	Eu151	Gd157	Tb159	Dy163	Ho165	Er167	Tm169	Yb173	Lu175	Hf177	Ta181	Pb208	Th232	U238	∑REE
			(ppm)	(ppm)	ppm	ppm	ppm	ppm	ppm	ppm	ppm	ppm	ppm	ppm	ppm	ppm	ppm	ppm	ppm	ppm	ppm	ppm	ppm	ppm	ppm	ppm	ppm	ppm	ppm	ppm	ppm	ppm	ppm	ppm	ppm	ppm	ppm	ppm	ppm	ppm	ppm	ppm	ppm	ppm	ppm
AMZ13	da_26		282053	108361	8.31	684.12	133.94	416.71	36.58	1.35	40.49	8.37	78.45	3.91	0.574	b.d.	25.31	93.66	2.34	21.31	3.5	7.92	1.043	1.88	24.85	2.6	2.61	0.375	1.53	0.221	0.05	0.249	0.0341	0.33	0.0537	0.147	0.0298	0.237	0.0357	0.37	0.155	1.369	0.43	2.05	8.5023
	da_27		282053	72793.1	6.54	827.87	131.95	447.36	30.62	1.361	42.24	8.49	74.43	4.01	0.71	b.d.	24.15	69.72	2.63	18.15	1.459	6.99	0.791	1.45	23.02	1.692	3.24	0.322	2.39	0.303	0.0718	0.394	0.0388	0.261	0.0662	0.173	0.0283	0.201	0.0332	0.394	0.1015	1.561	0.396	2.15	9.2143
	da_28		282053	142078	6.47	700.91	169.59	453.16	35.49	1.166	41.72	10.21	110.83	4.14	0.71	b.d.	24.01	81.13	2.52	20.89	1.529	8.01	1.19	1.82	25.53	1.99	2.95	0.45	1.56	0.229	0.091	0.346	0.0432	0.218	0.067	0.203	0.0122	0.25	0.0293	0.388	0.096	2.41	0.388	1.81	8.4387
	da_30		282053	216776	7.95	541.35	139.65	408.46	48.72	1.076	40.22	9.42	104.72	3.64	0.481	b.d.	18.05	110.72	2.08	22.02	1.053	11.75	1.062	1.275	19.29	1.597	2.07	0.288	1.07	0.201	0.0513	0.148	0.0343	0.185	0.0554	0.133	0.0259	0.324	0.0405	0.399	0.0839	1.87	0.29	1.354	6.2234
	da_31		282053	116586	7.61	605.96	149.07	445.03	31.13	1.435	42.78	9.65	90.97	4.26	0.493	b.d.	24.9	74.18	2.73	21.48	1.412	7.68	0.867	1.62	23.28	1.794	2.53	0.296	1.29	0.254	0.0674	0.261	0.0367	0.246	0.0618	0.206	0.0319	0.193	0.0328	0.309	0.1256	1.544	0.336	1.82	7.3006
	da_32		282053	117781	6.25	471.85	136.47	375	35.51	1.032	40.61	8.58	80.14	3.72	0.58	b.d.	20.42	75.47	2.62	19.8	1.019	6.46	0.795	1.3	18.58	1.646	2.32	0.282	1.21	0.225	0.073	0.266	0.0524	0.283	0.0611	0.266	0.0275	0.307	0.033	0.299	0.0704	1.389	0.321	1.5	7.052
AMZ9	da_34		282053	99774.8	11.63	794.24	291.68	707.66	88.46	4.29	66.07	25.49	278.75	8.88	2.58	1.63	35.28	129.16	8.37	48.6	1.272	37.81	2.46	2.69	33.14	6.19	10.44	1.74	7.75	1.58	0.398	1.51	0.188	1.5	0.199	0.679	0.077	0.91	0.117	1.11	0.077	12.77	4.41	5.54	33.278
	da_36		282053	23692.6	10.28	848.37	350.55	818.66	66.19	4.45	67.52	28.22	201.68	10.69	1.84	2.06	46.21	55.63	4.51	34.02	2.13	12.81	2.23	3.17	45.87	3.68	6.37	0.95	4.34	0.9	0.19	0.88	0.088	0.627	0.092	0.306	0.0507	0.313	0.0505	0.801	0.16	5.84	1.244	3.5	18.8372
AMZ8	de_30		282053	25372.7	6.9	182.52	237.2	630.76	b.d.	0.53	37.44	20.11	56.22	3.29	1.14	b.d.	7.19	36.11	2.06	15.9	0.489	16.85	0.69	0.53	7.34	1.4	1.54	0.297	1.35	0.364	0.047	0.068	0.038	0.156	0.055	0.139	0.0246	0.084	0.0142	0.53	0.0059	2.08	0.676	2.27	5.5768
	de_32		282053	15589.3	7.2	651.97	285.97	742.62	26.83	1.4	39.71	23.72	57.84	4.83	2.88	b.d.	21.76	52.15	4.02	24.04	1.5	3.29	0.74	1.37	29.86	2.41	4.07	0.62	1.94	0.509	0.167	0.61	0.0478	0.422	0.094	0.282	0.0175	0.272	0.055	0.579	0.065	2.06	0.835	4.65	11.5163
	de_33		282053	11701.4	9.53	767.08	345.32	959.19	37.1	2.04	50.77	30.5	64.53	5.67	2.54	b.d.	26.1	59.9	3.75	28.42	1.54	3.12	0.65	1.66	27.92	2.71	4.37	0.64	2.36	0.482	0.124	0.455	0.072	0.384	0.09	0.238	0.0369	0.263	0.0533	0.669	0.11	1.9	0.831	3.85	12.2782
	de_40		282053	24994	7.13	515.03	282.33	723.25	17.68	1.21	36.16	19.24	37.78	4.64	2.03	b.d.	19.42	116.21	7.71	25.4	1.03	1.92	0.63	1.24	20	4.36	6	1.01	4.01	0.81	0.237	0.9	0.188	0.68	0.185	0.451	0.079	0.457	0.077	0.601	0.0568	1.2	1.46	6.83	19.444
b.d. refers to below detection
